# Supplementary material
Source: publisher figshare collection journal article supplement (https://frontiersin.figshare.com/ndownloader/files/28996251)

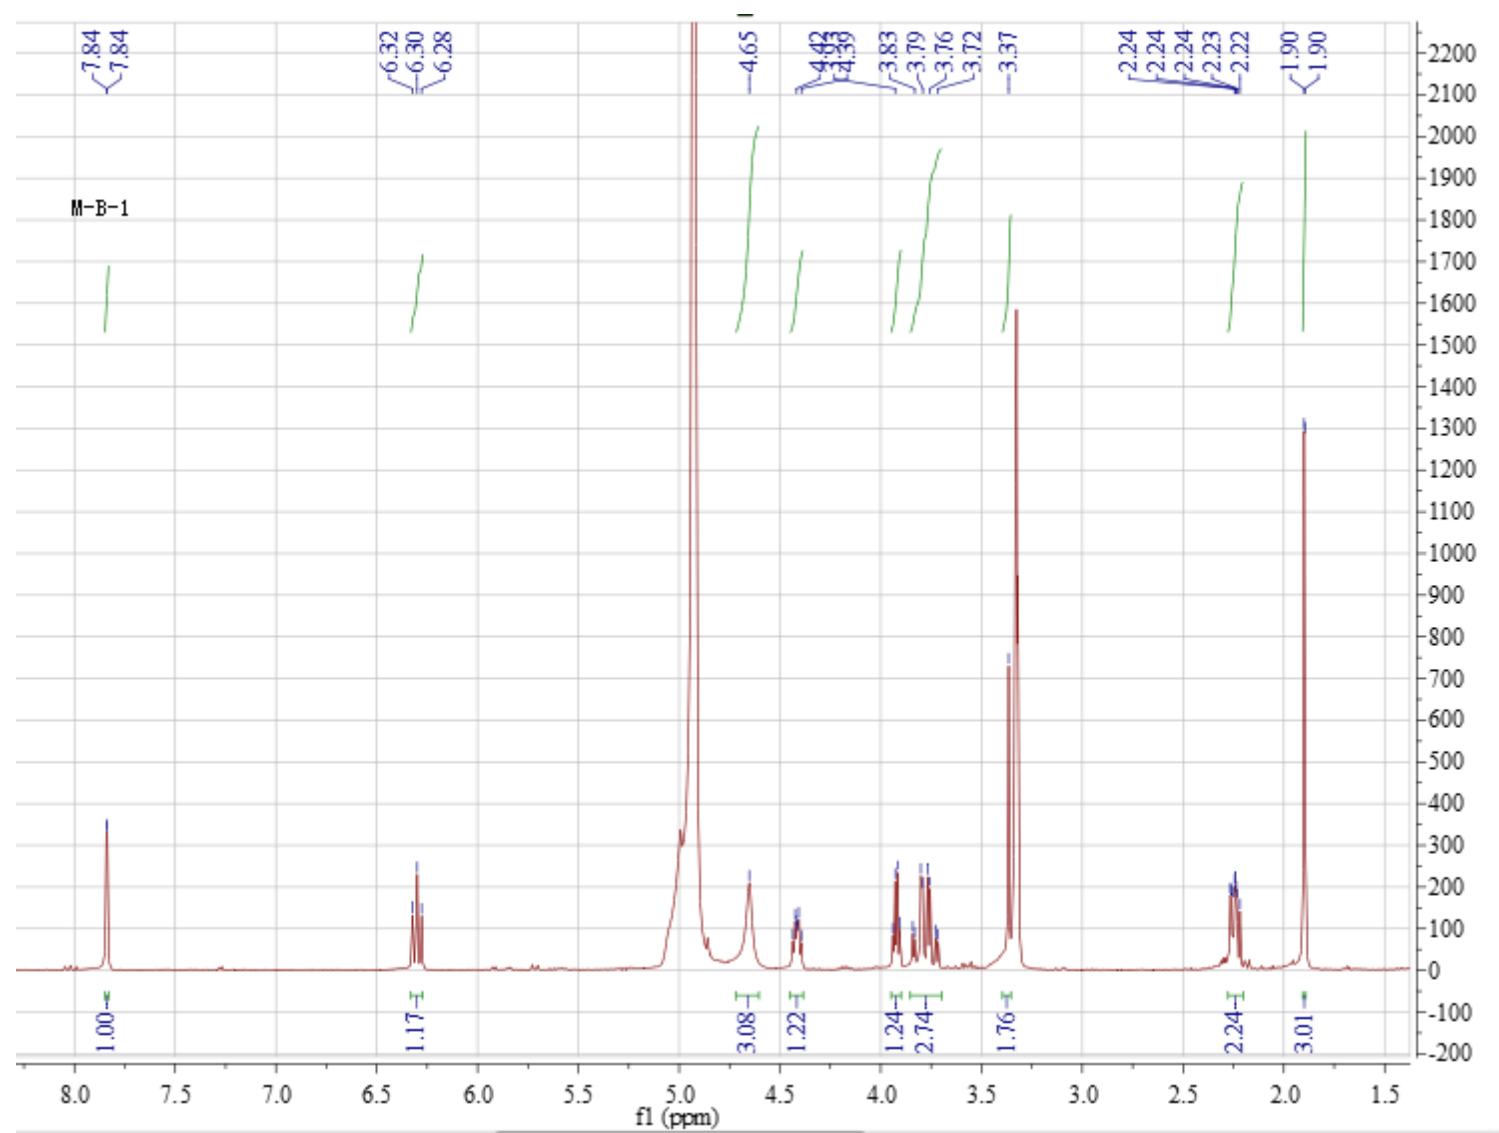

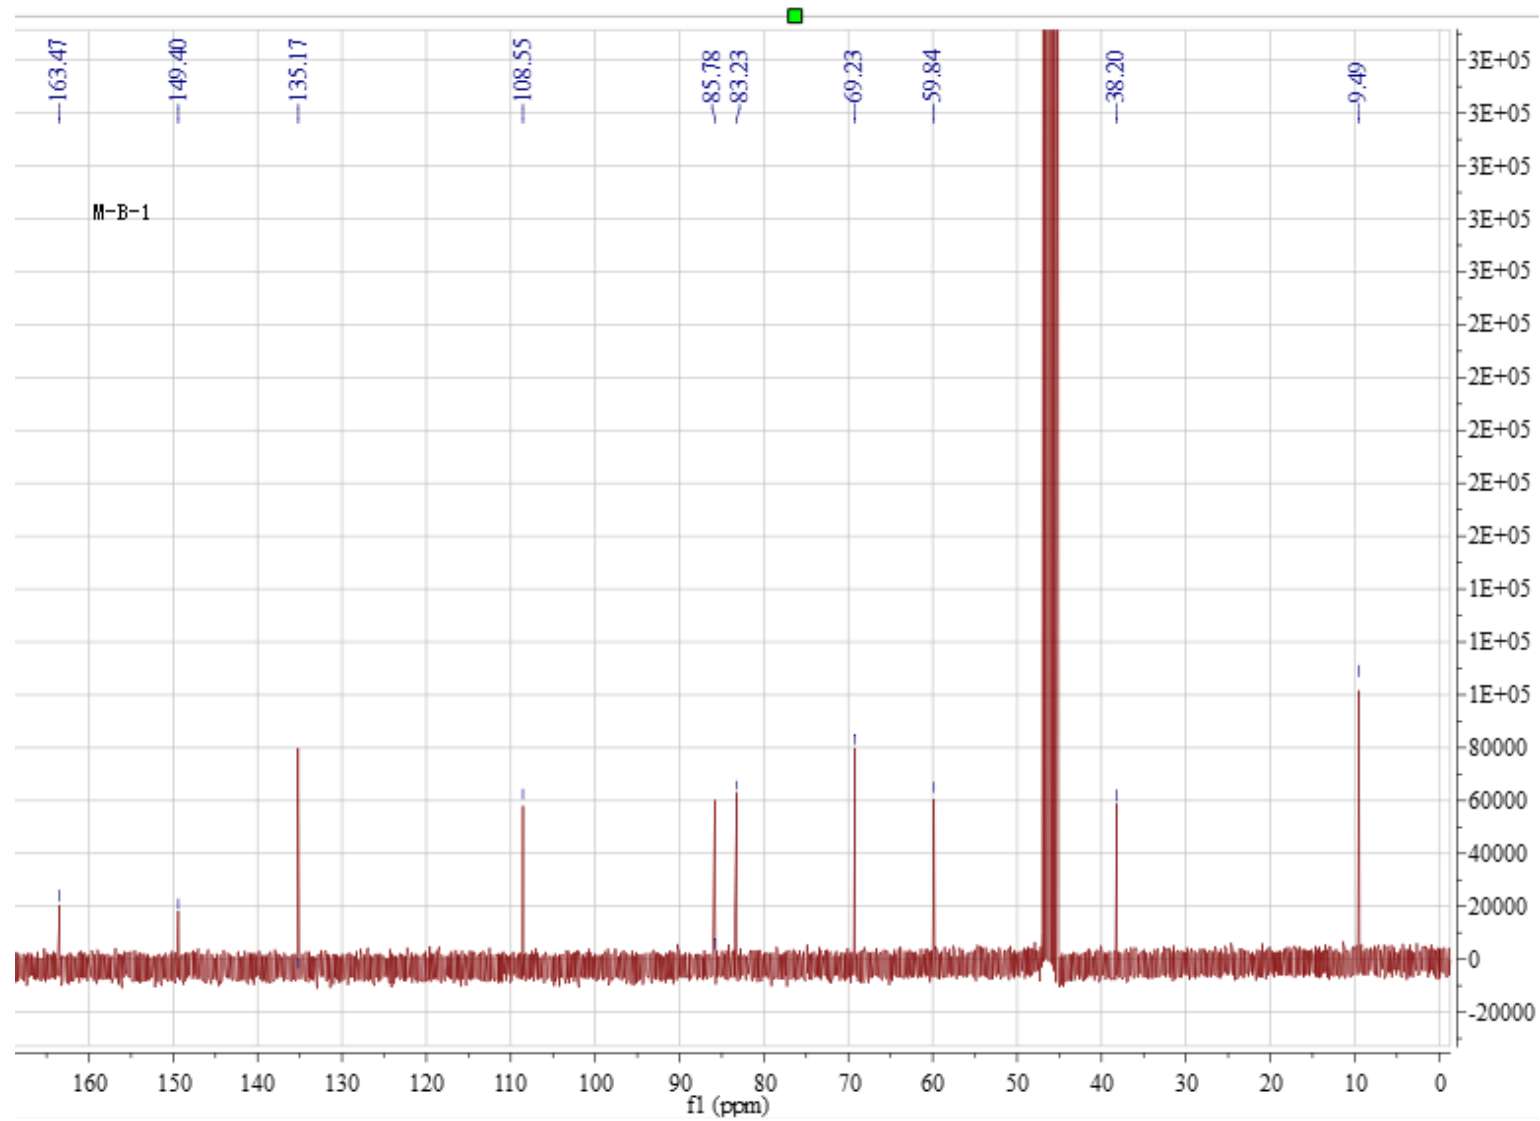

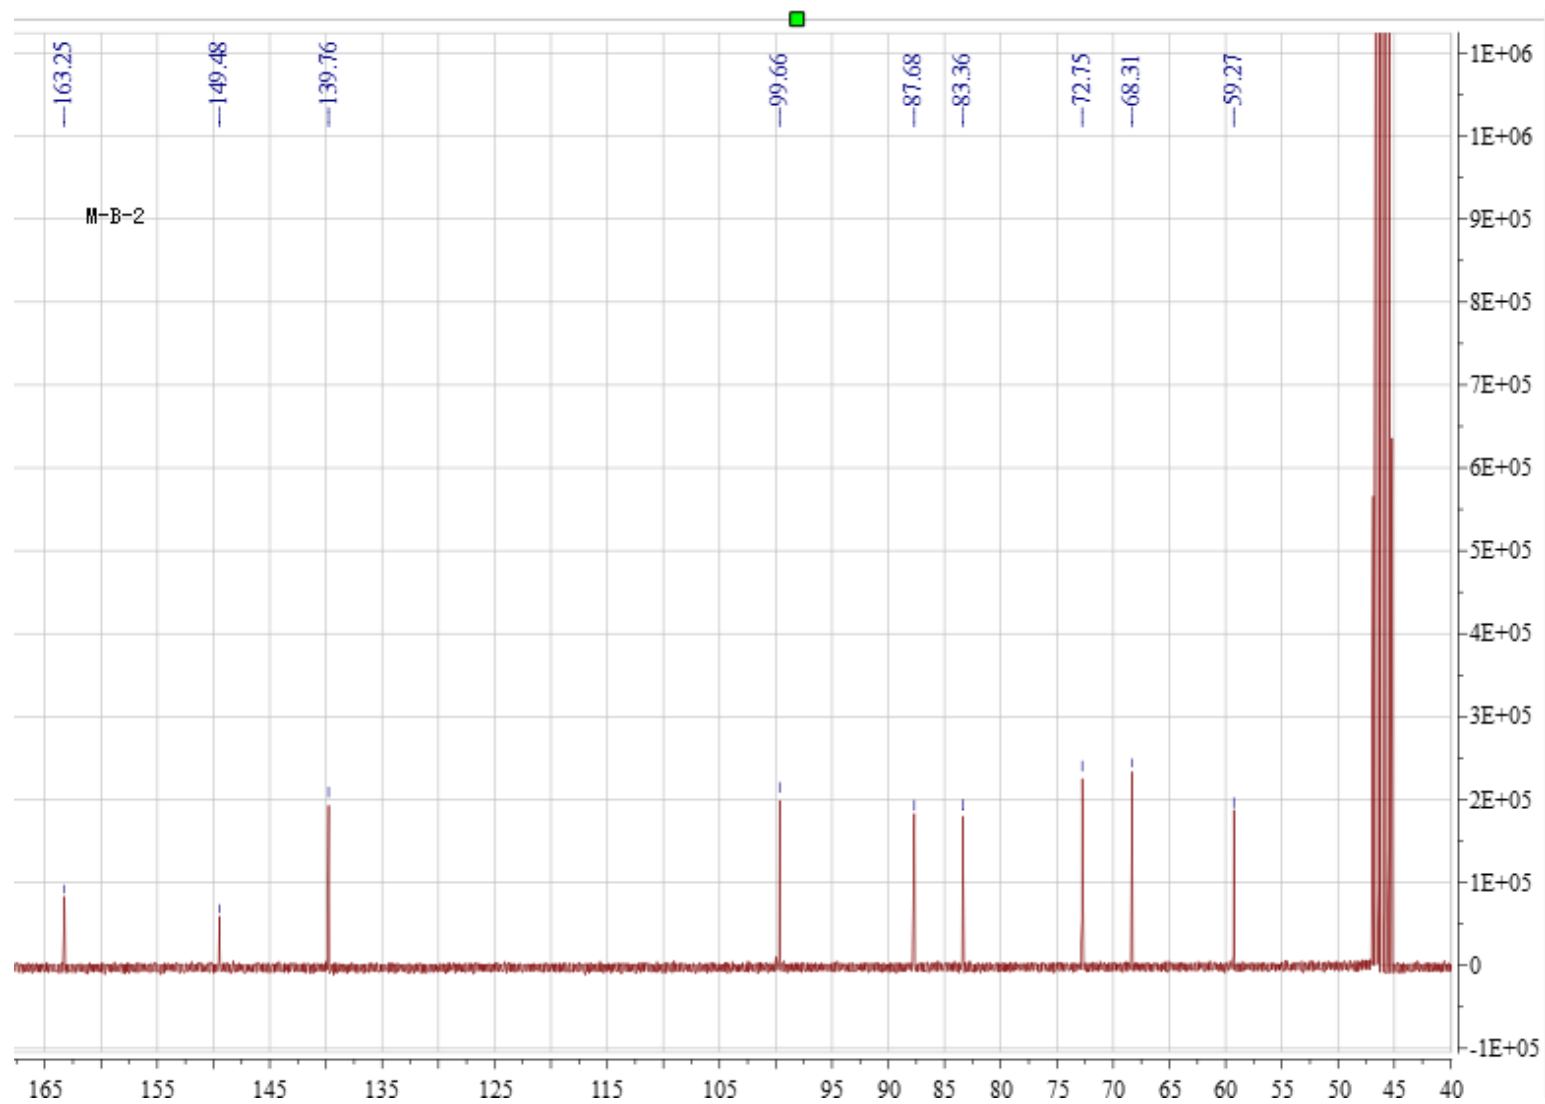

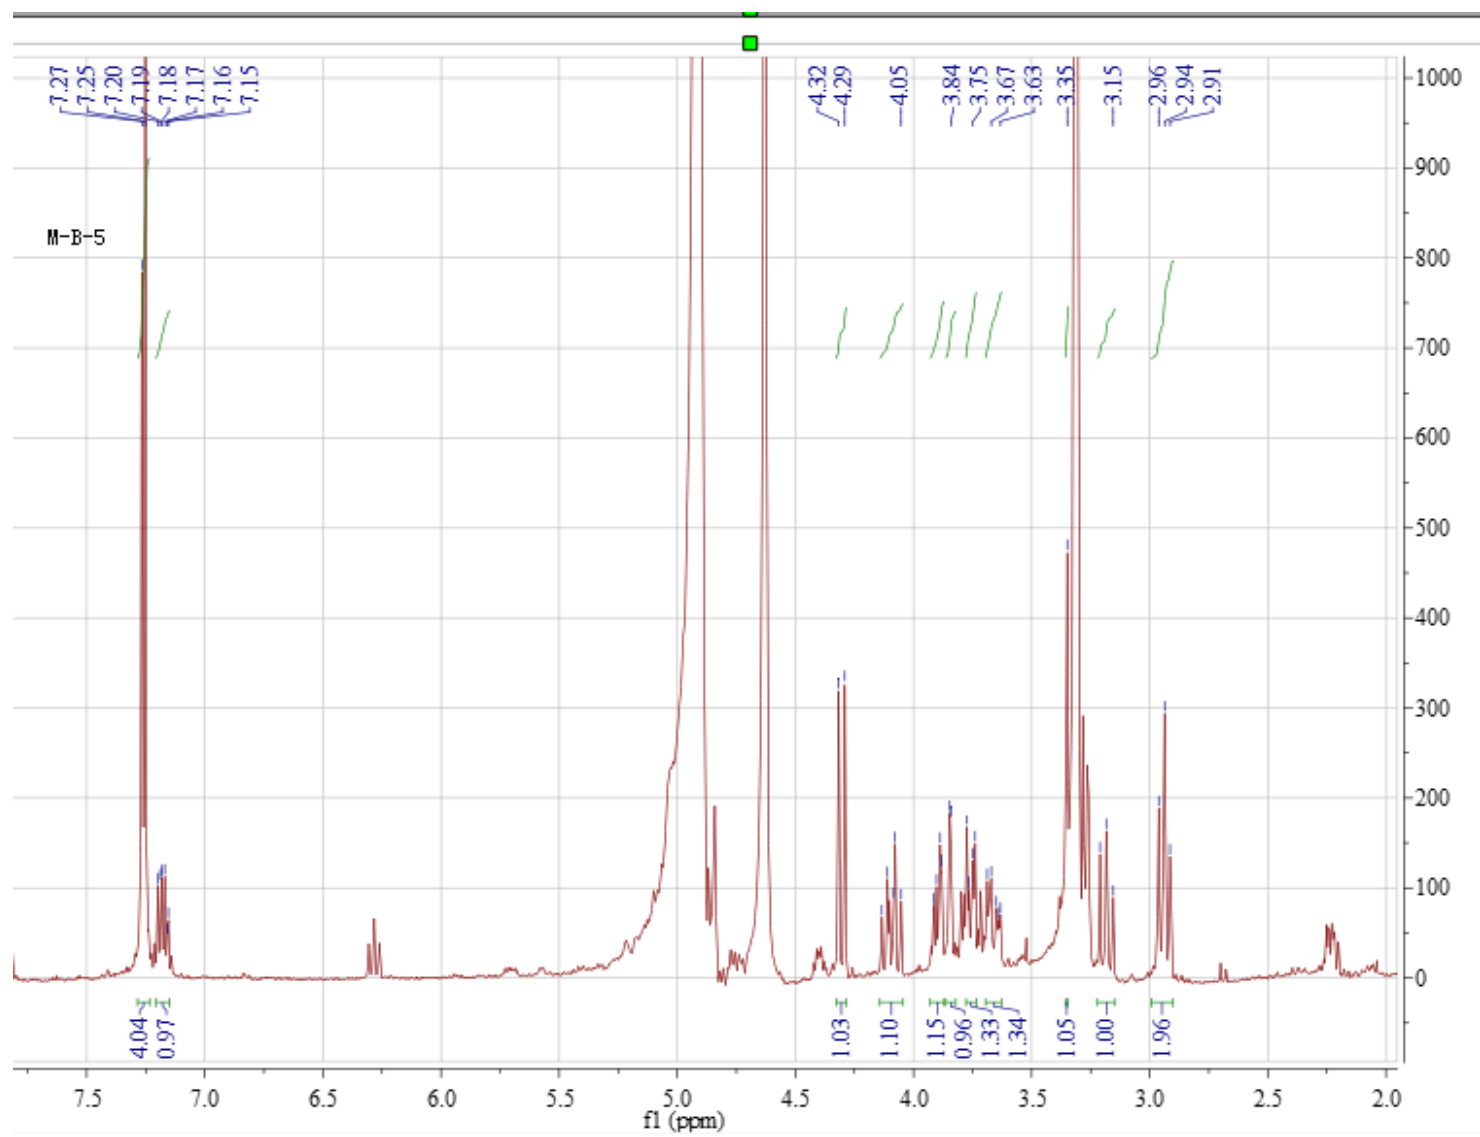

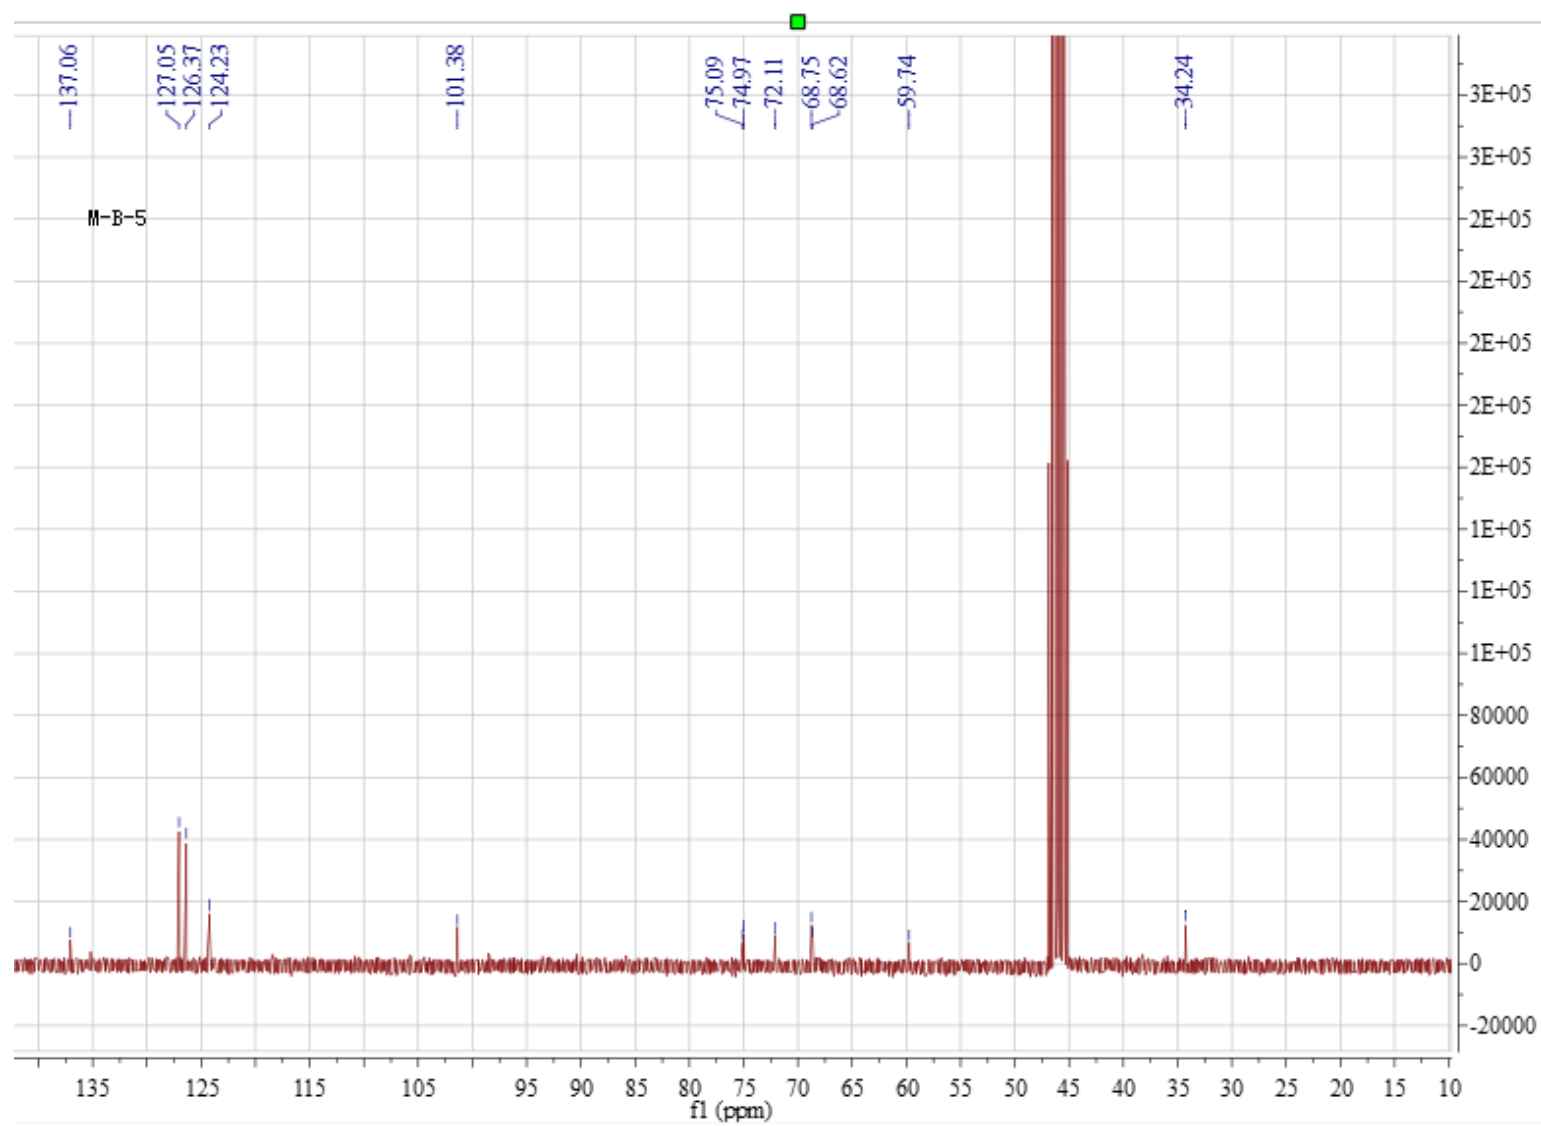

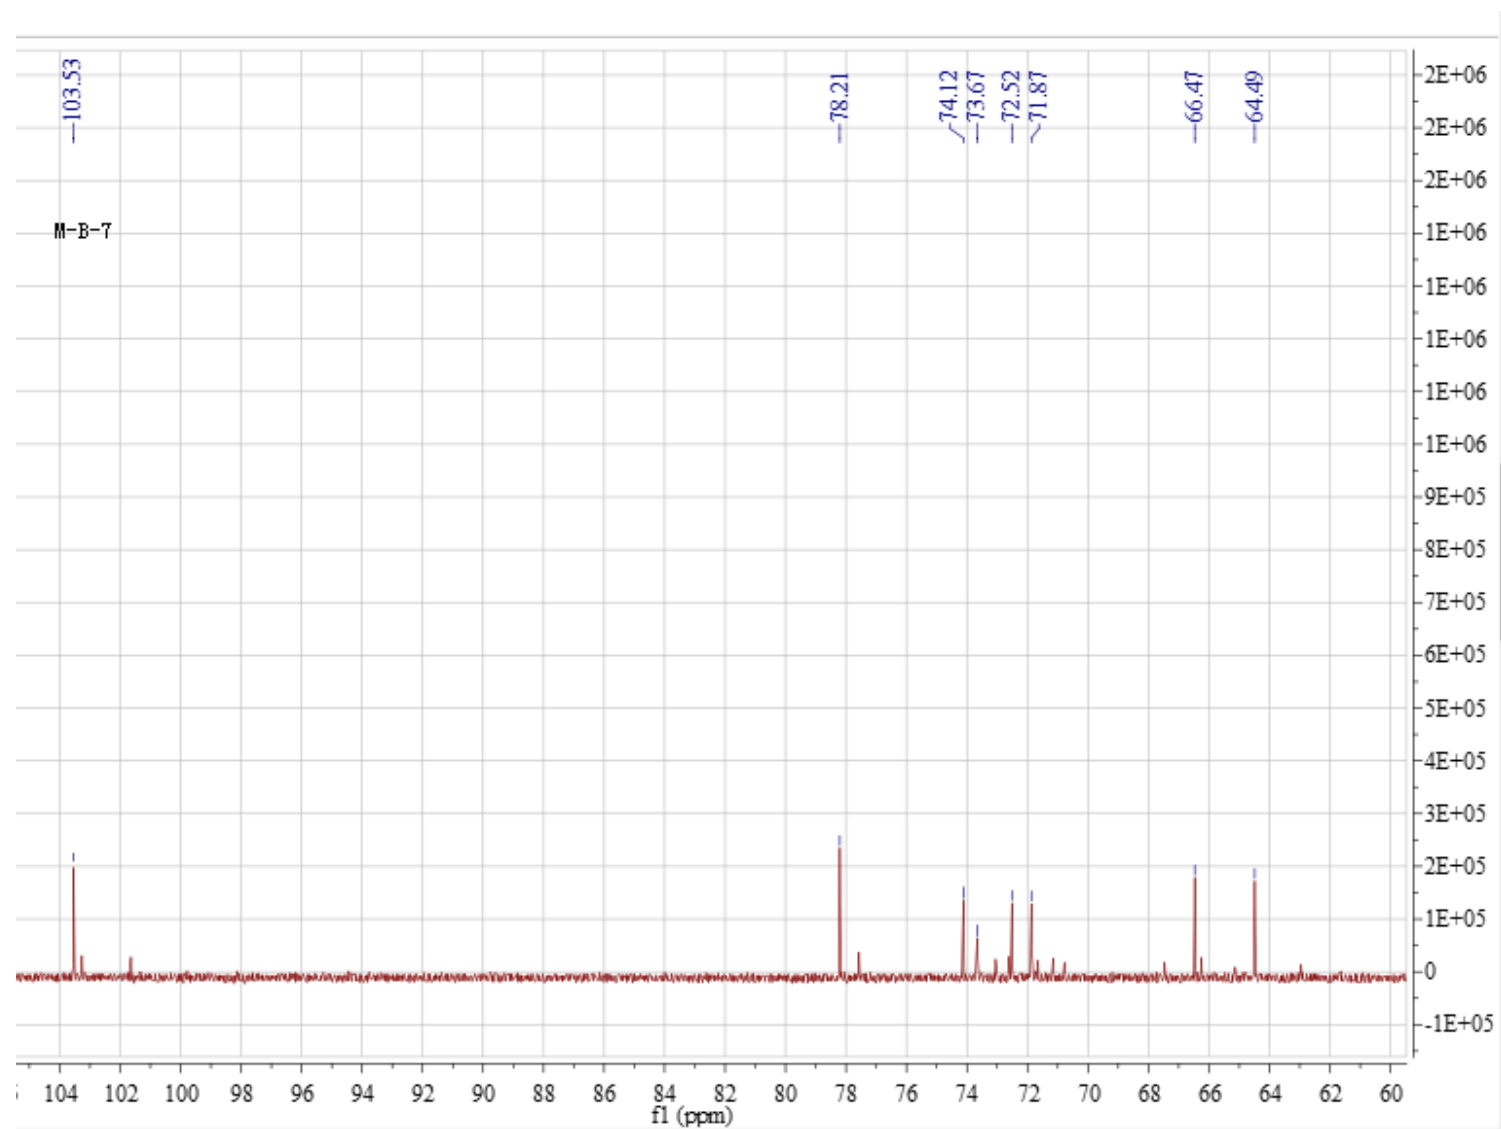

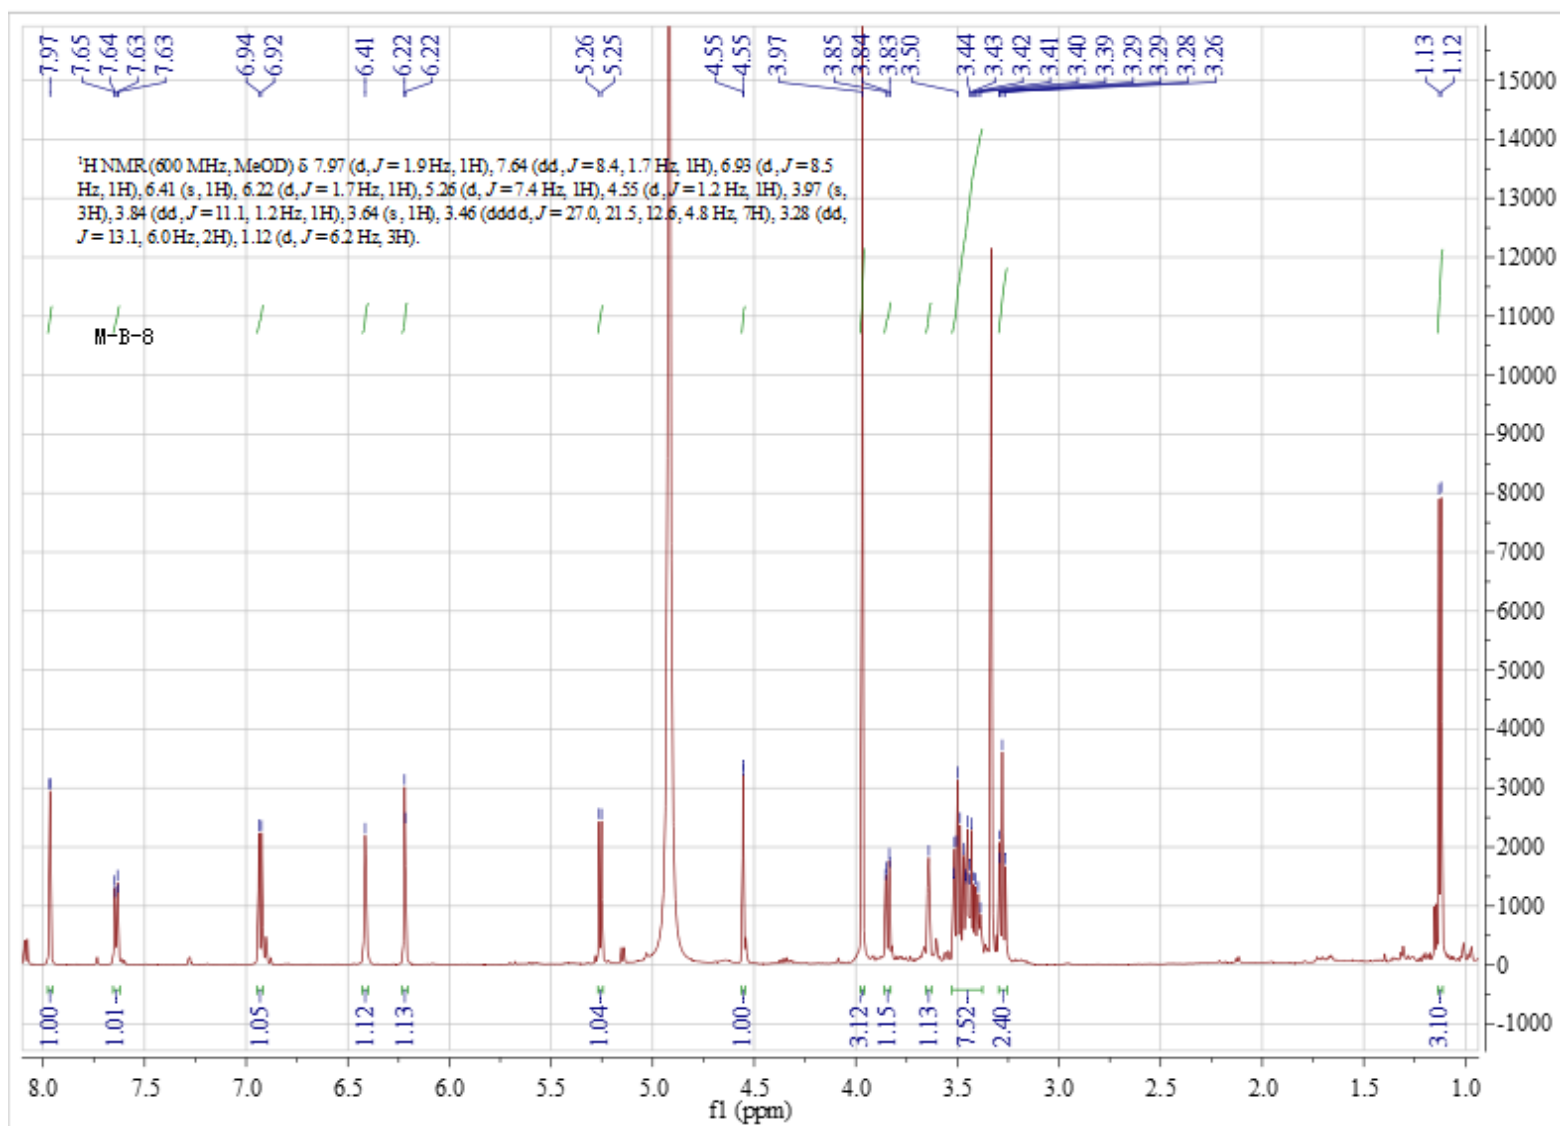

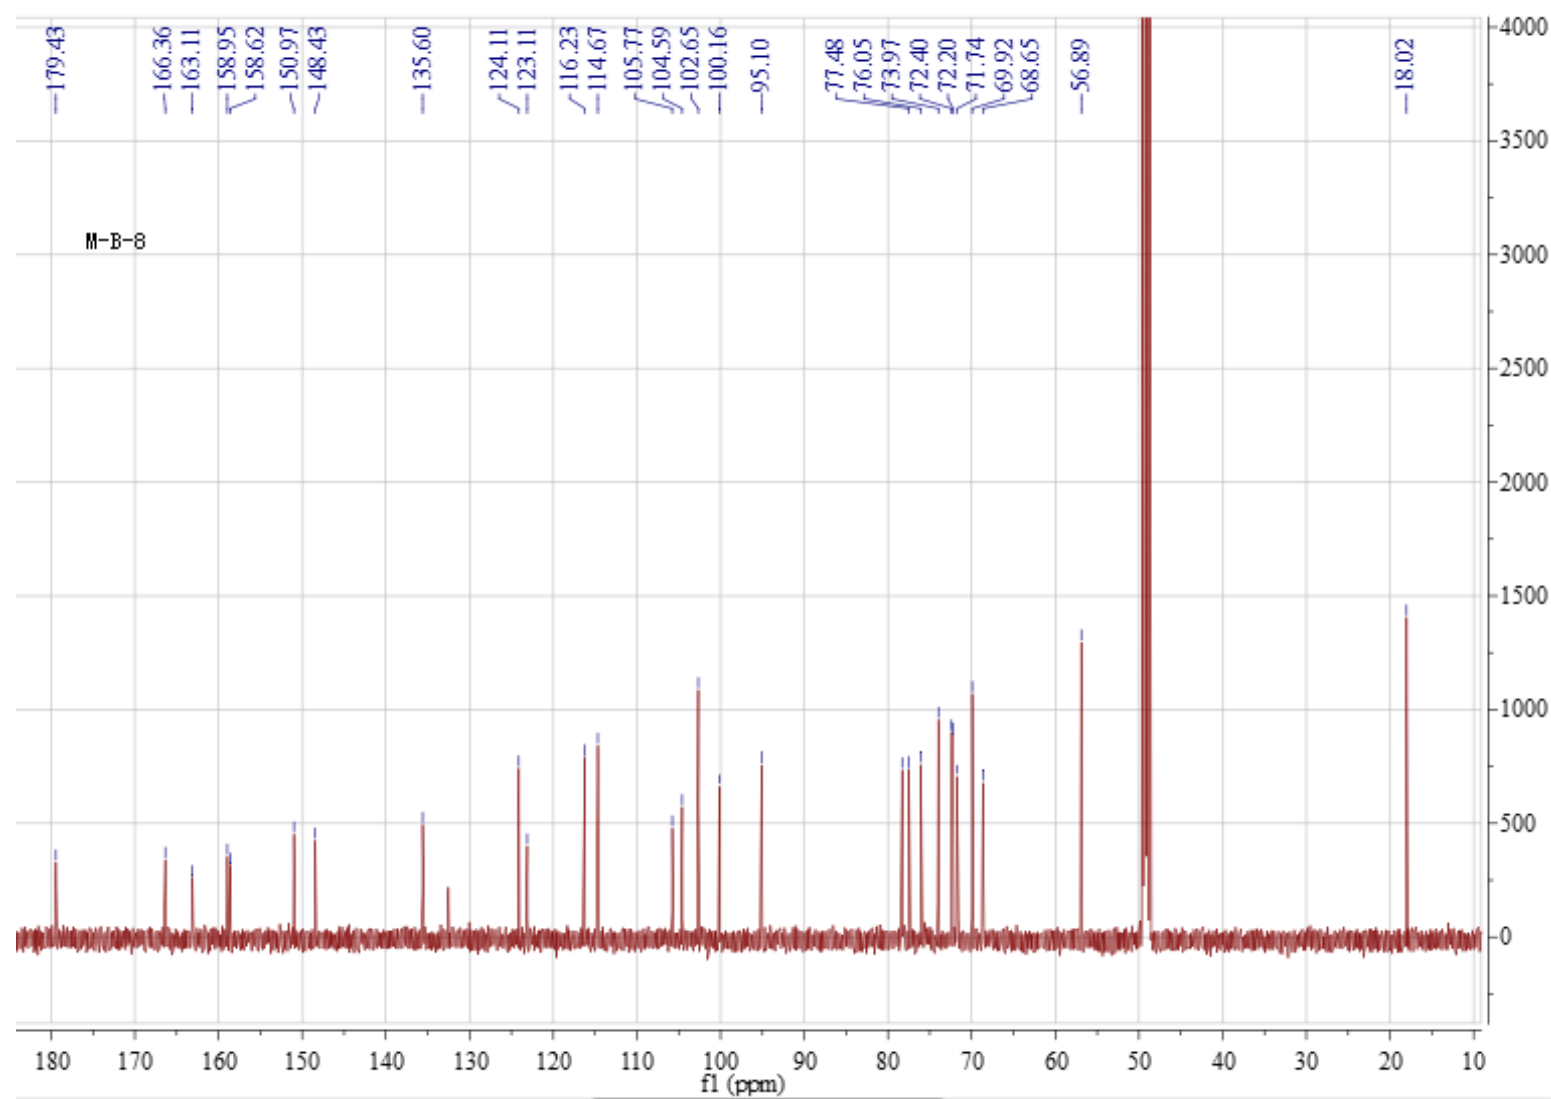

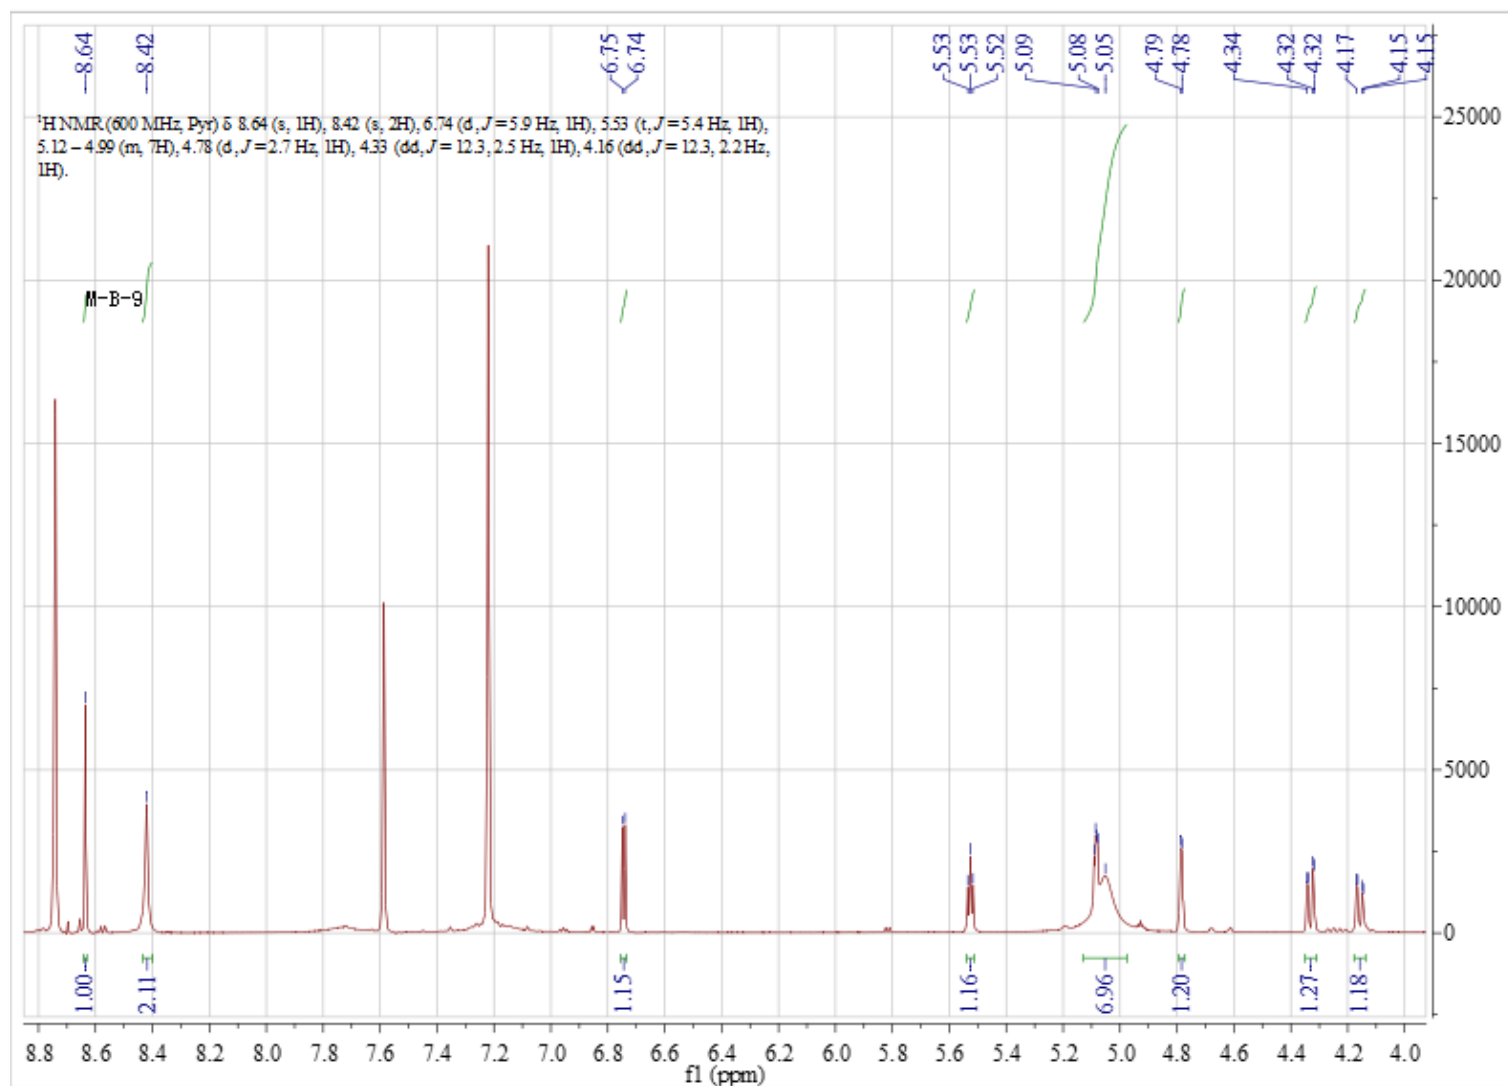

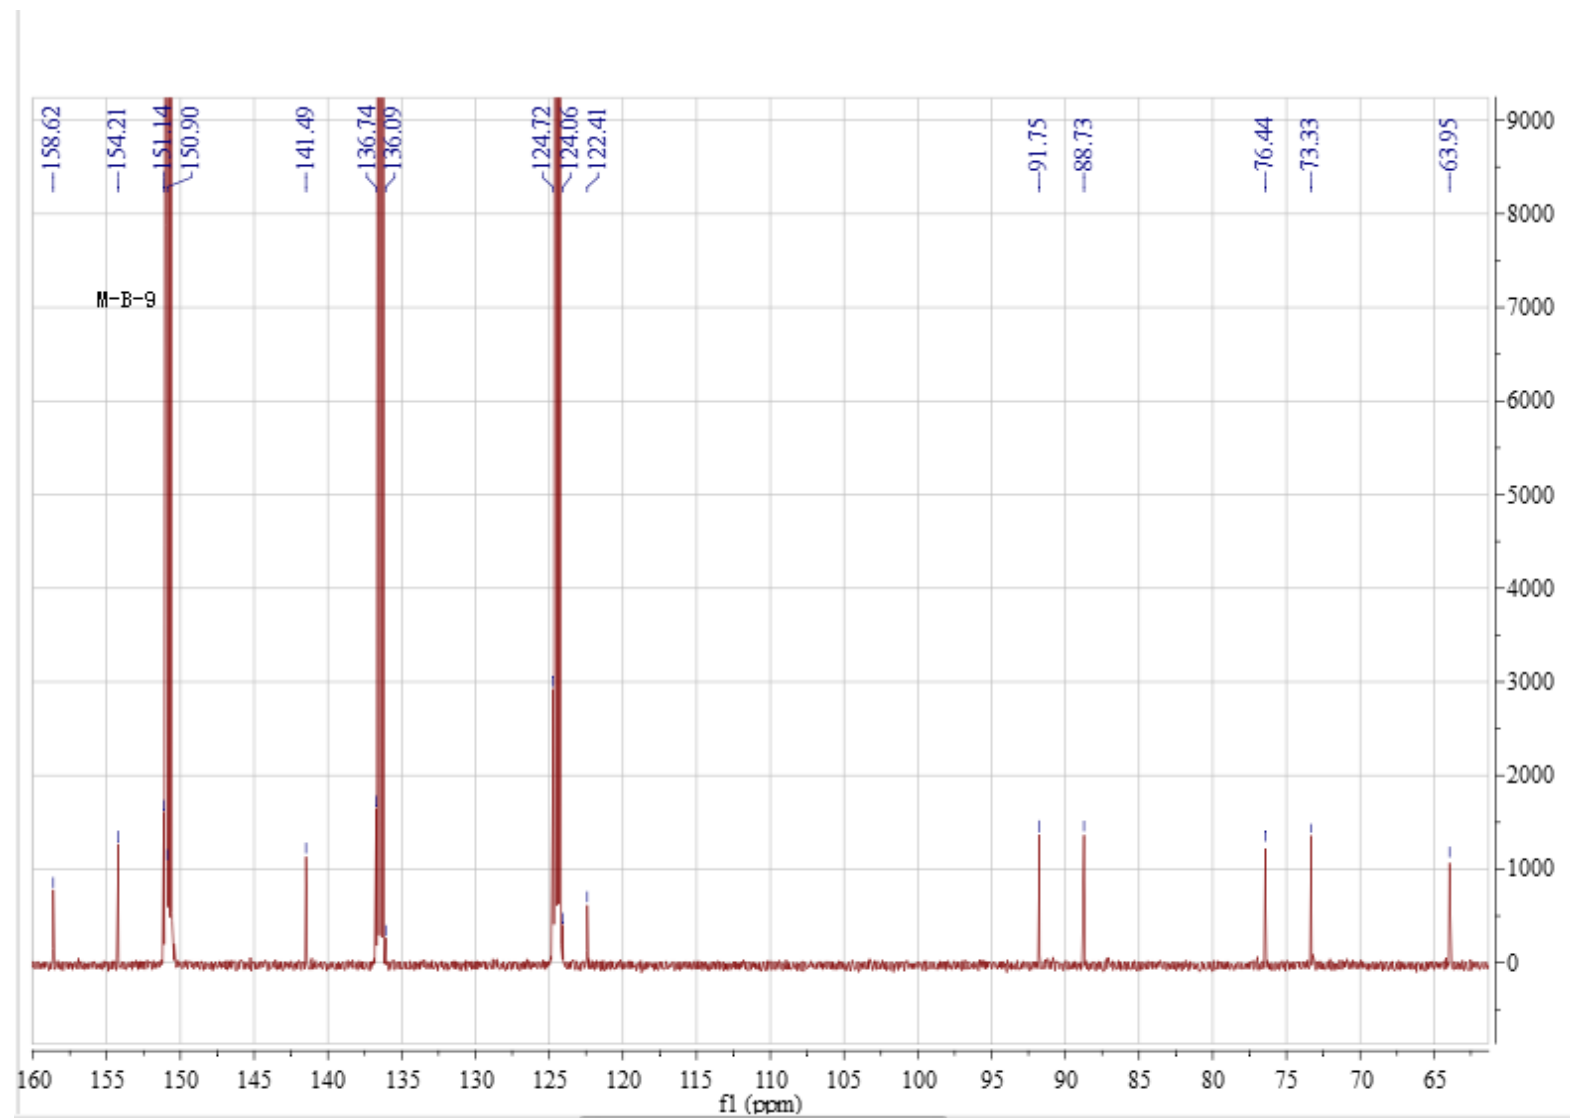

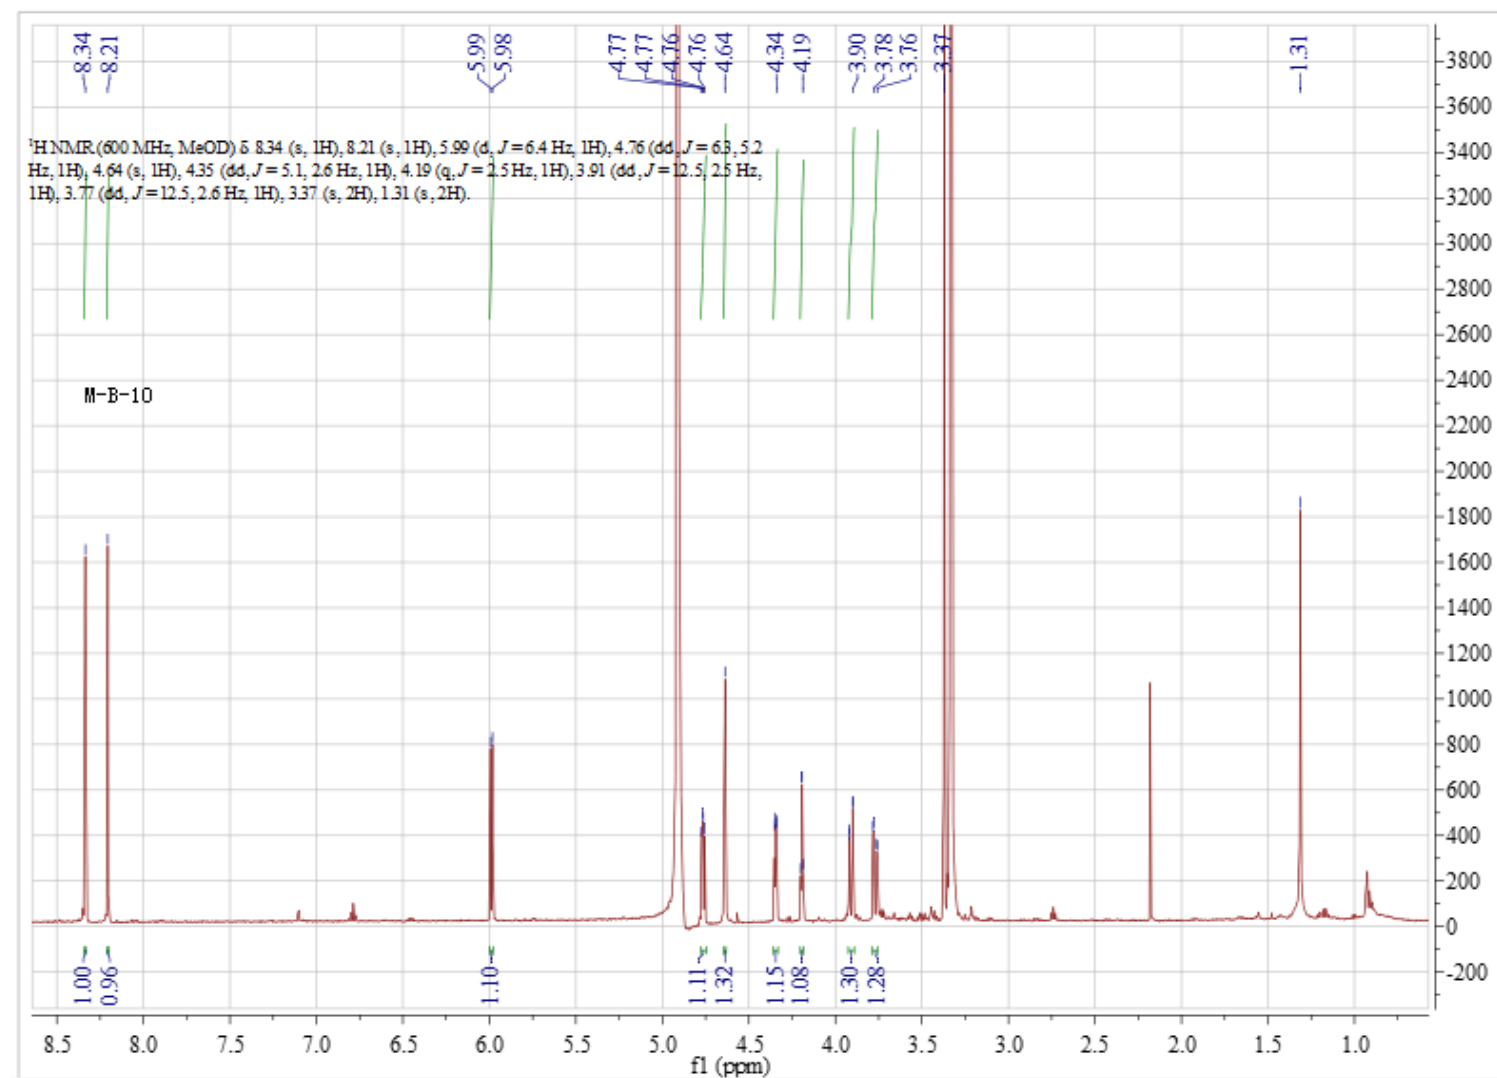

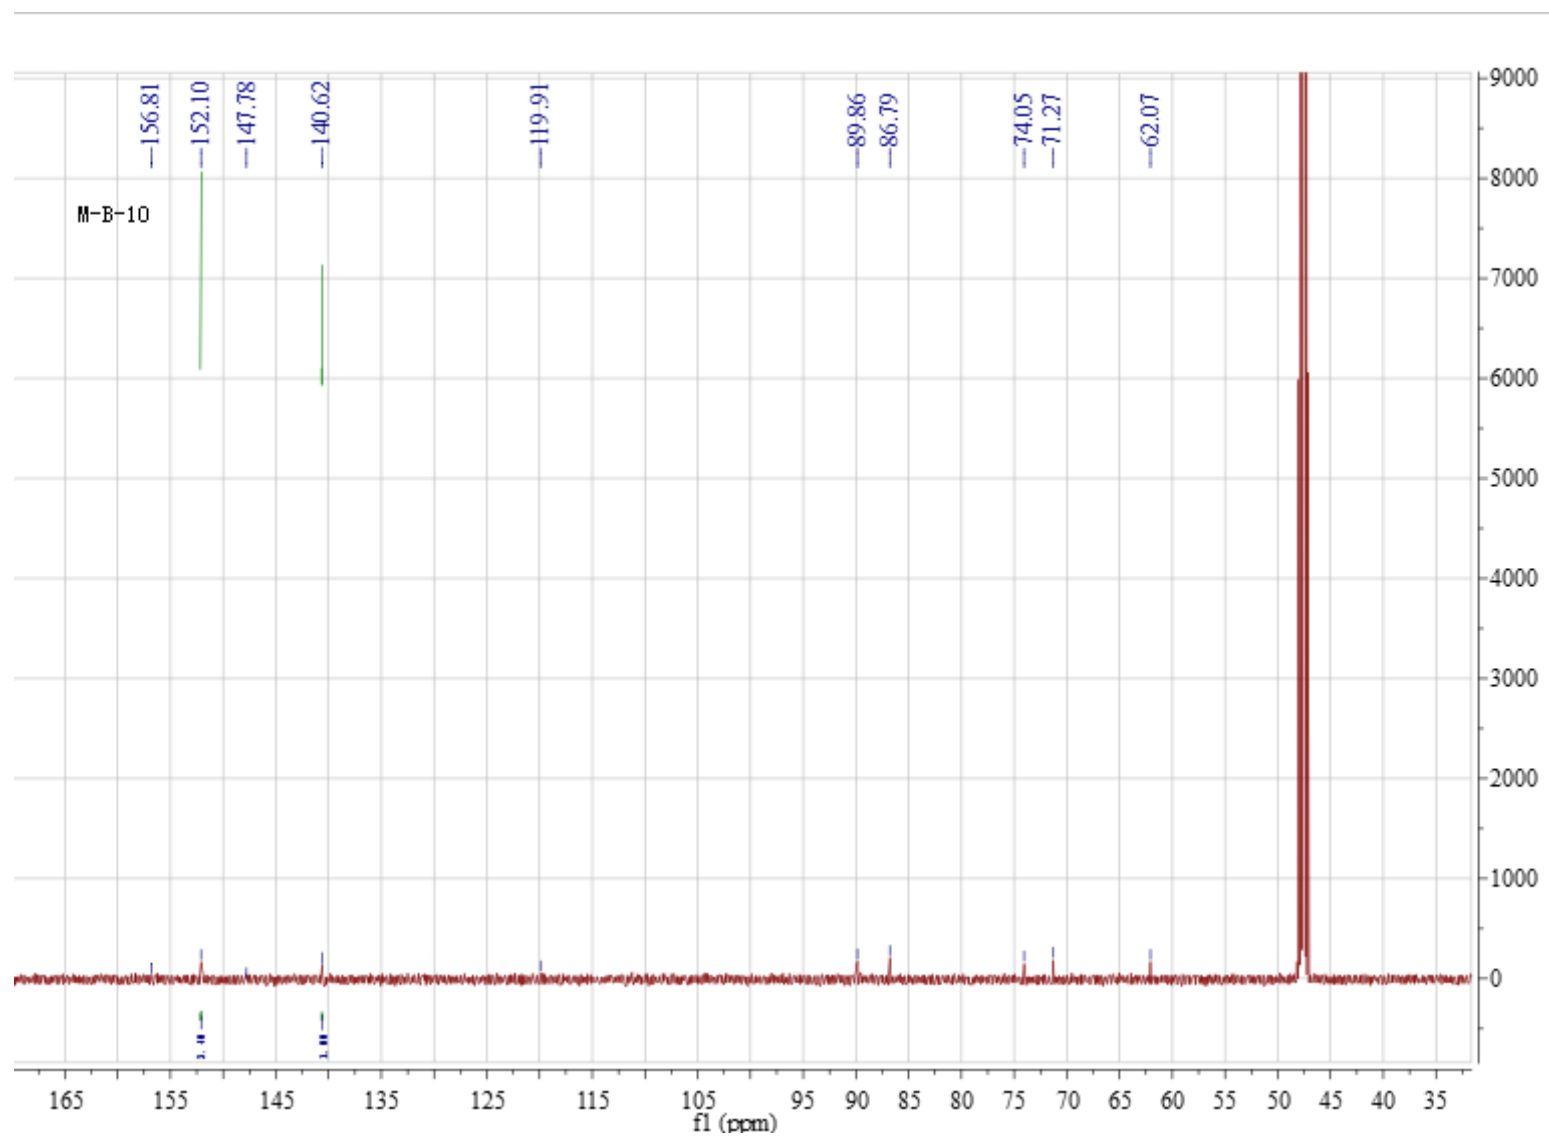

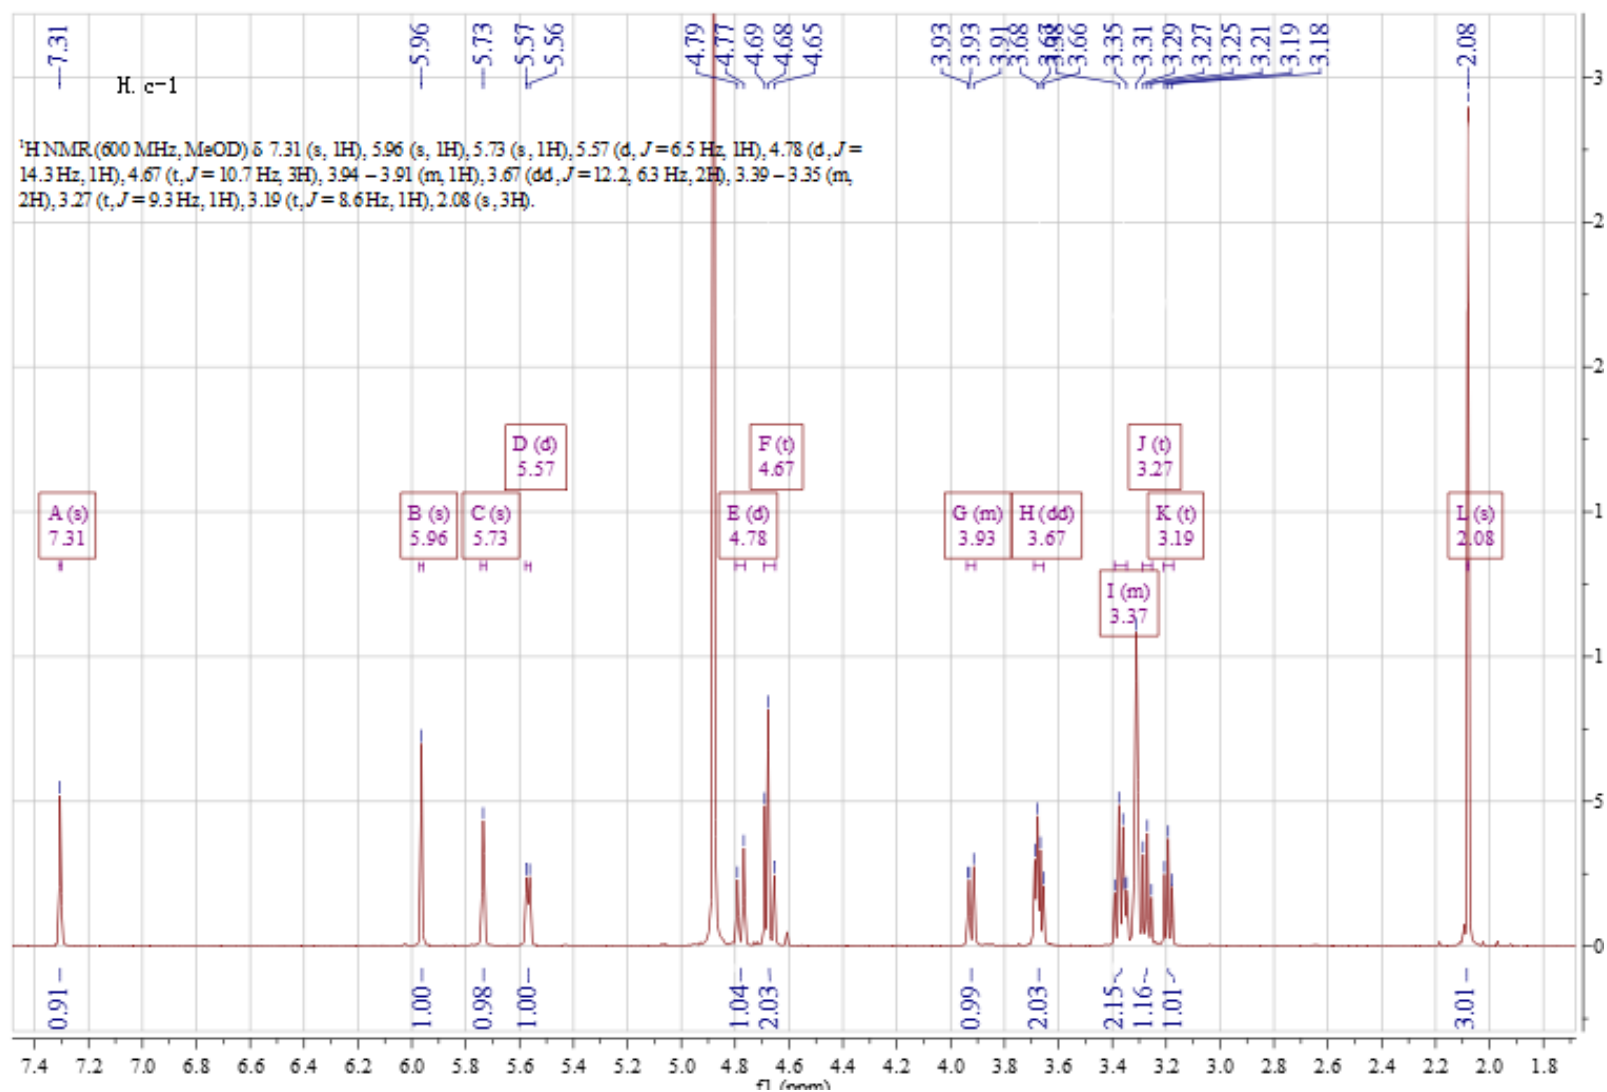

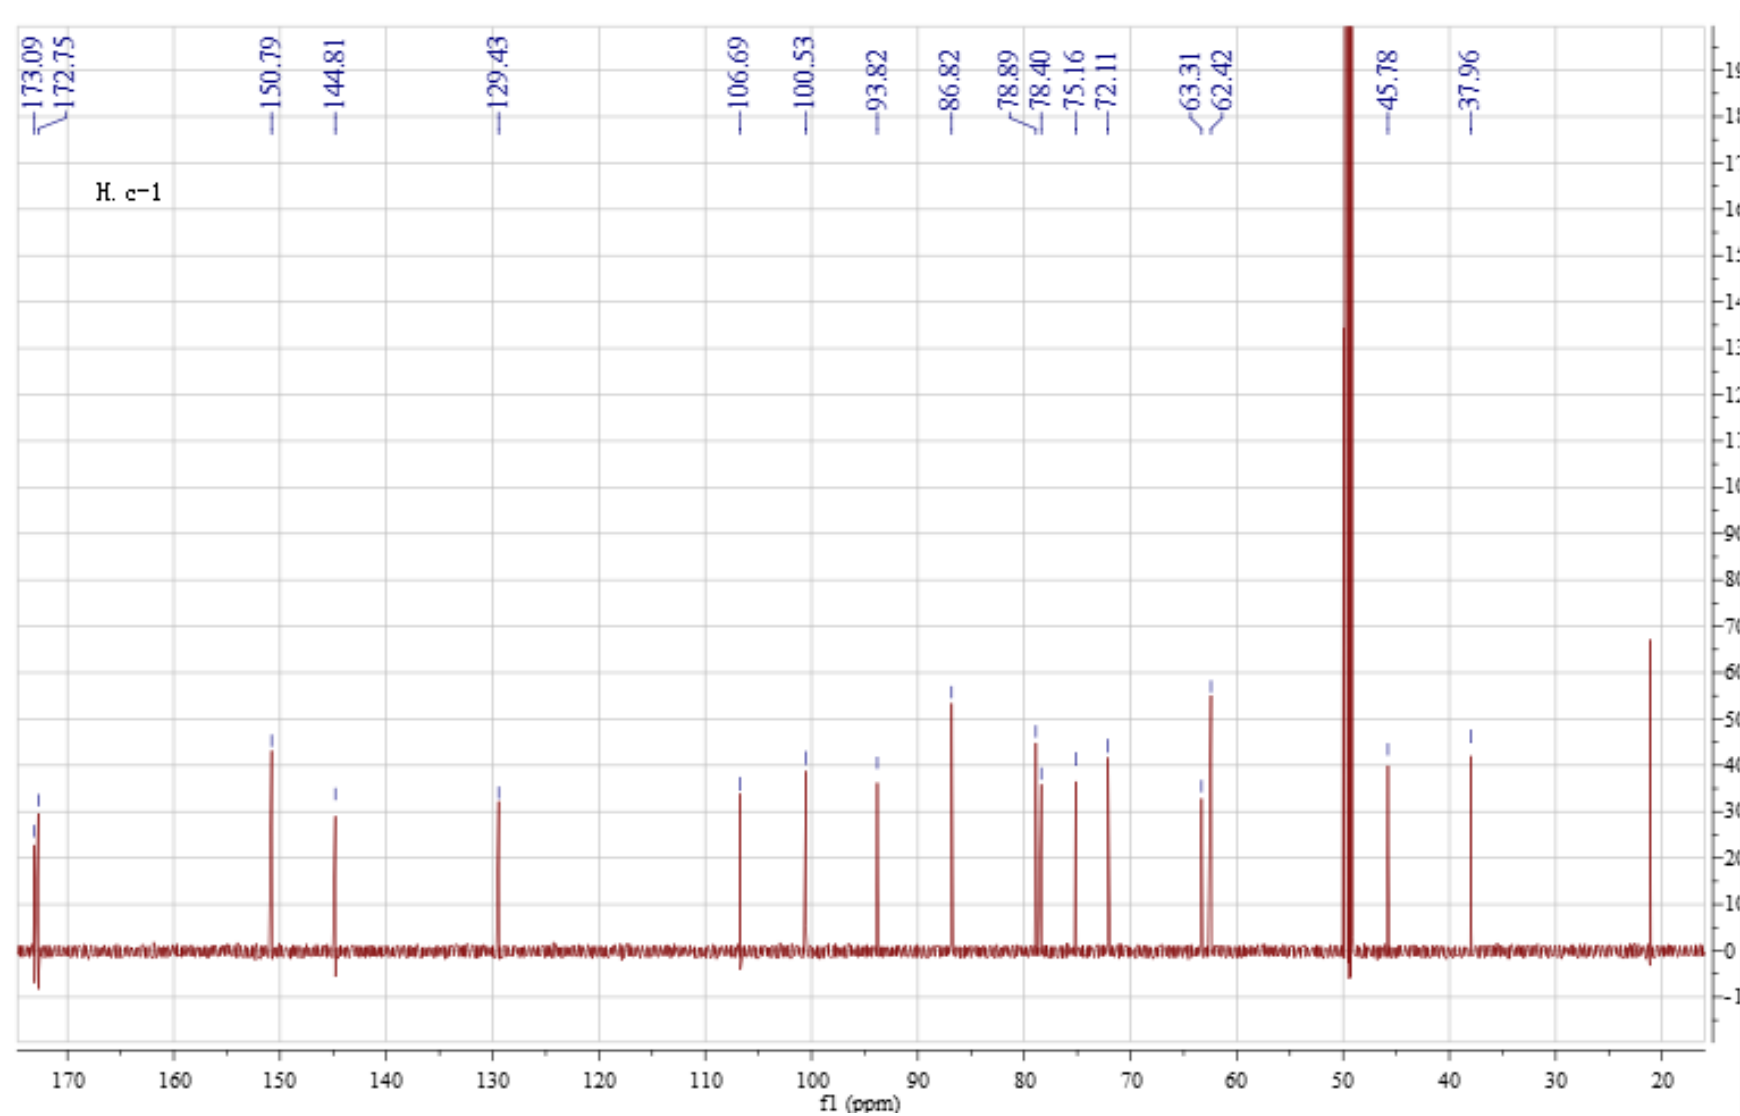

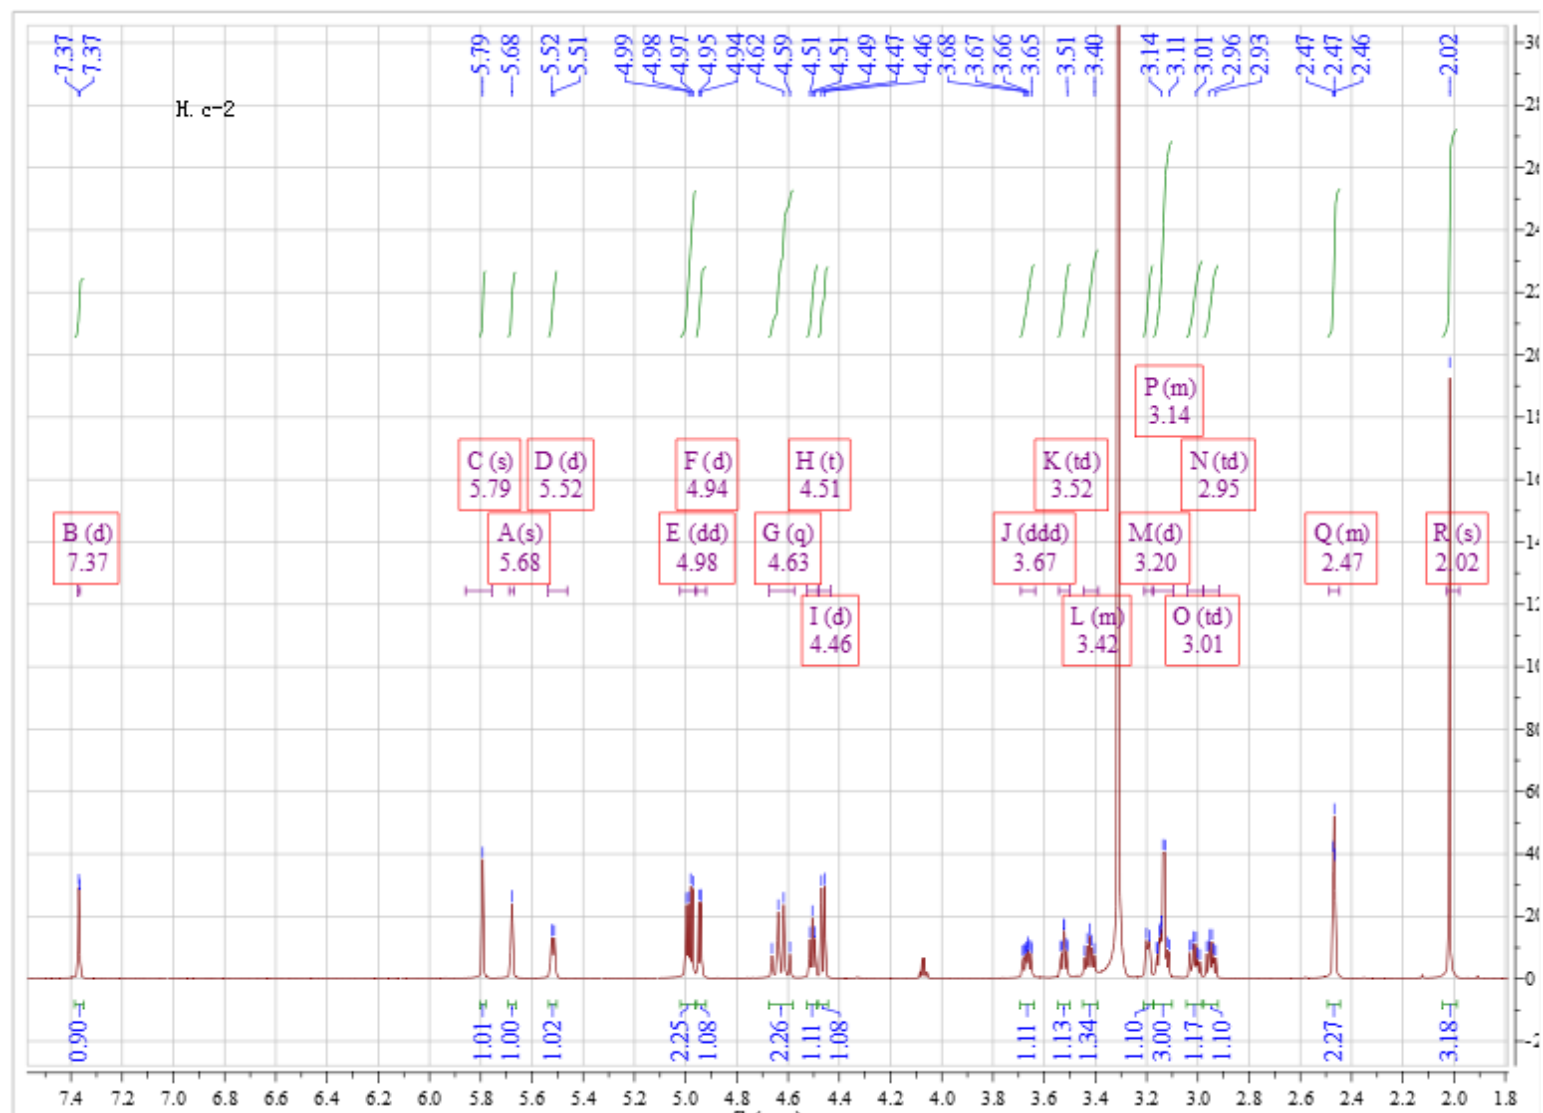

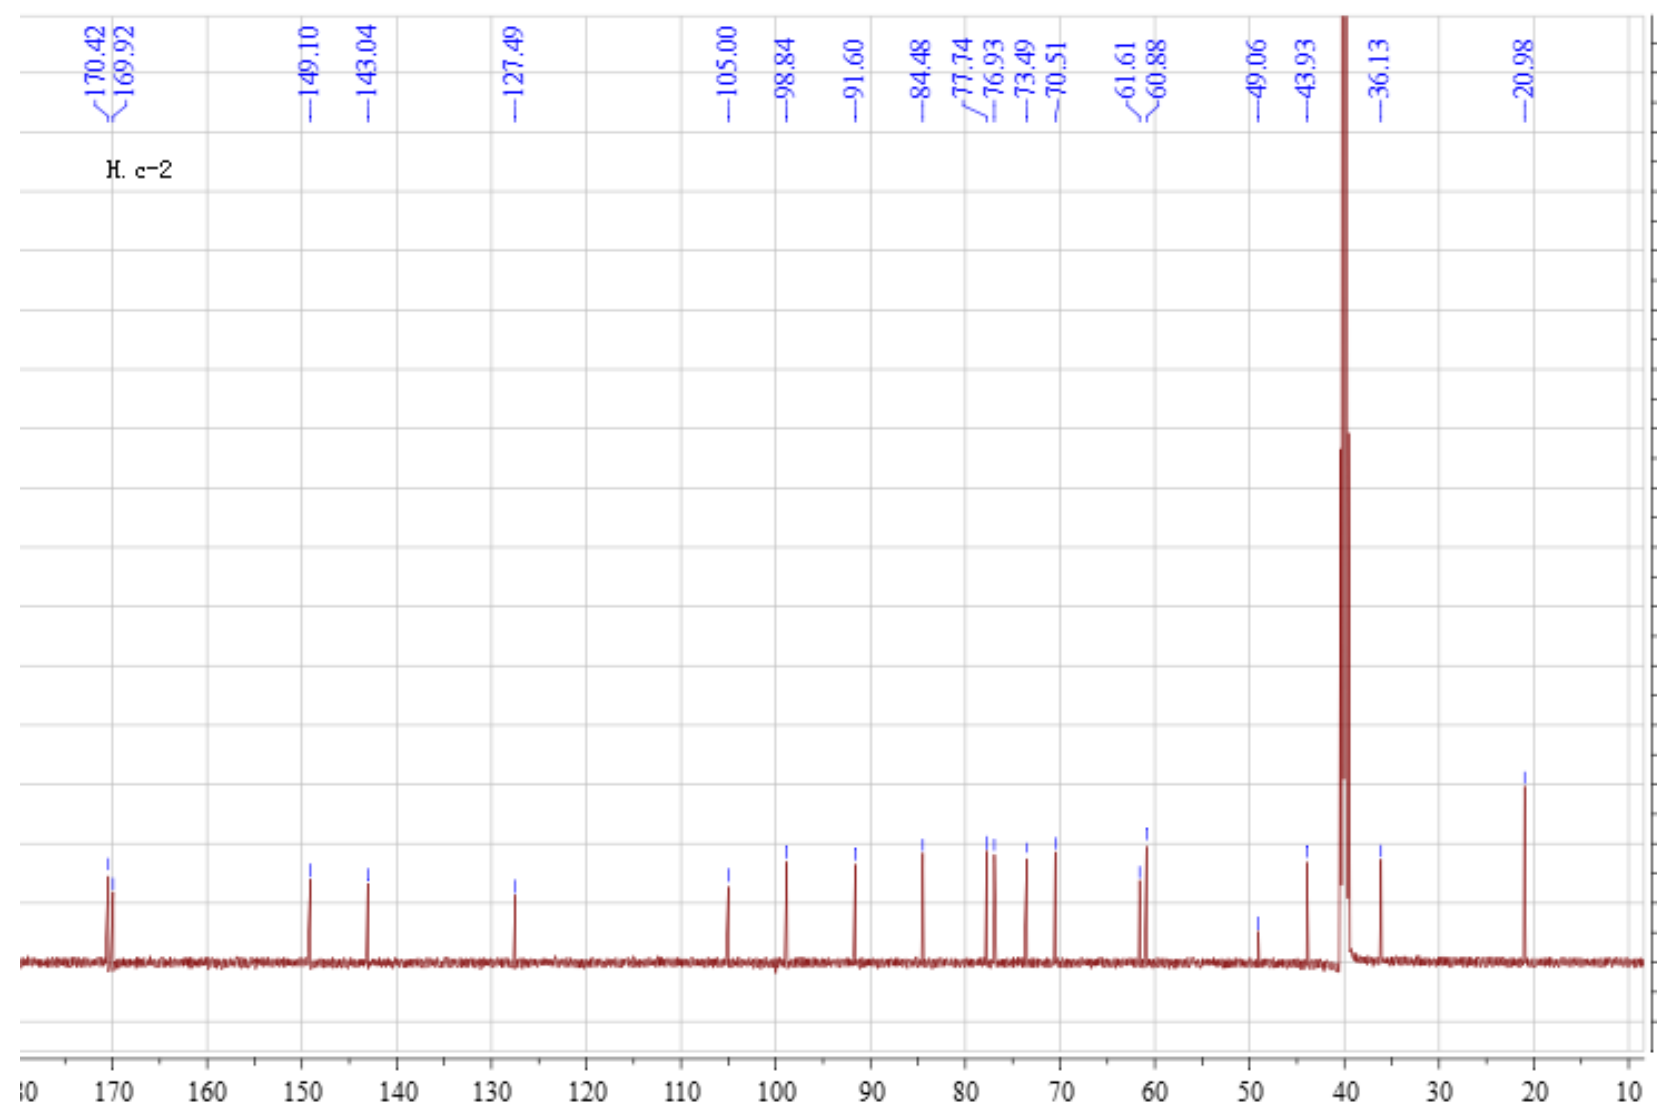

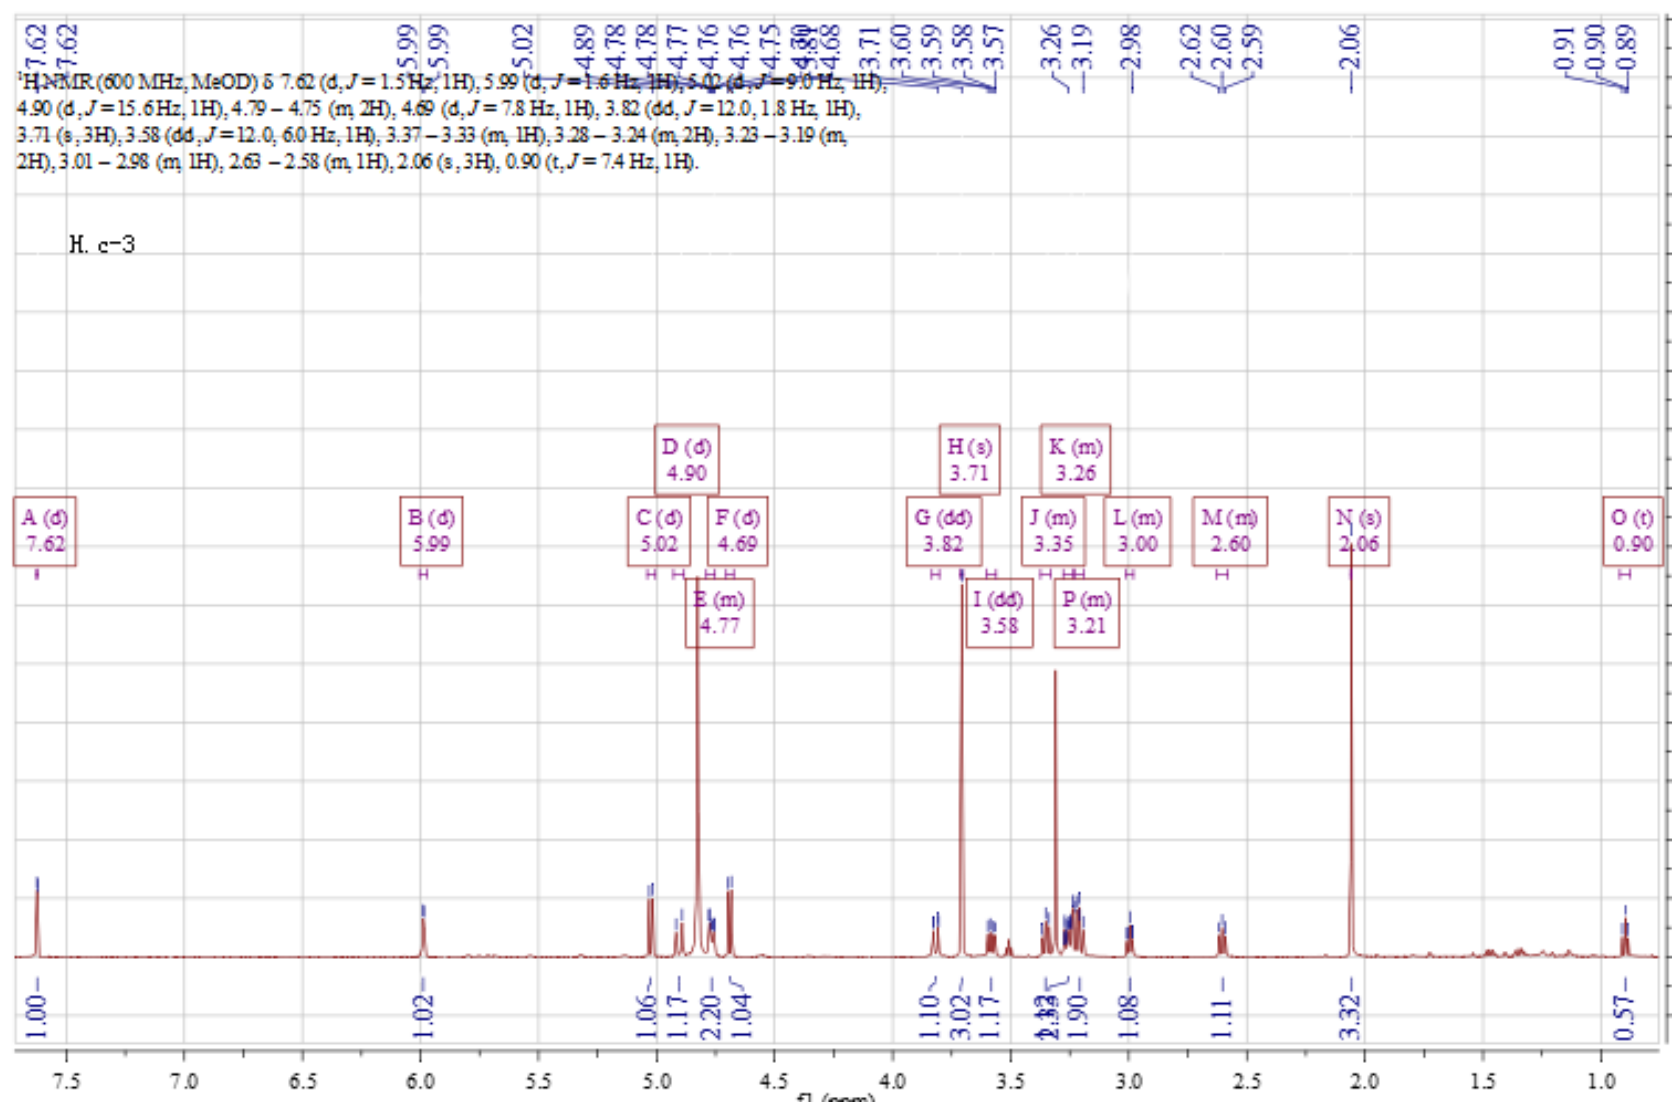

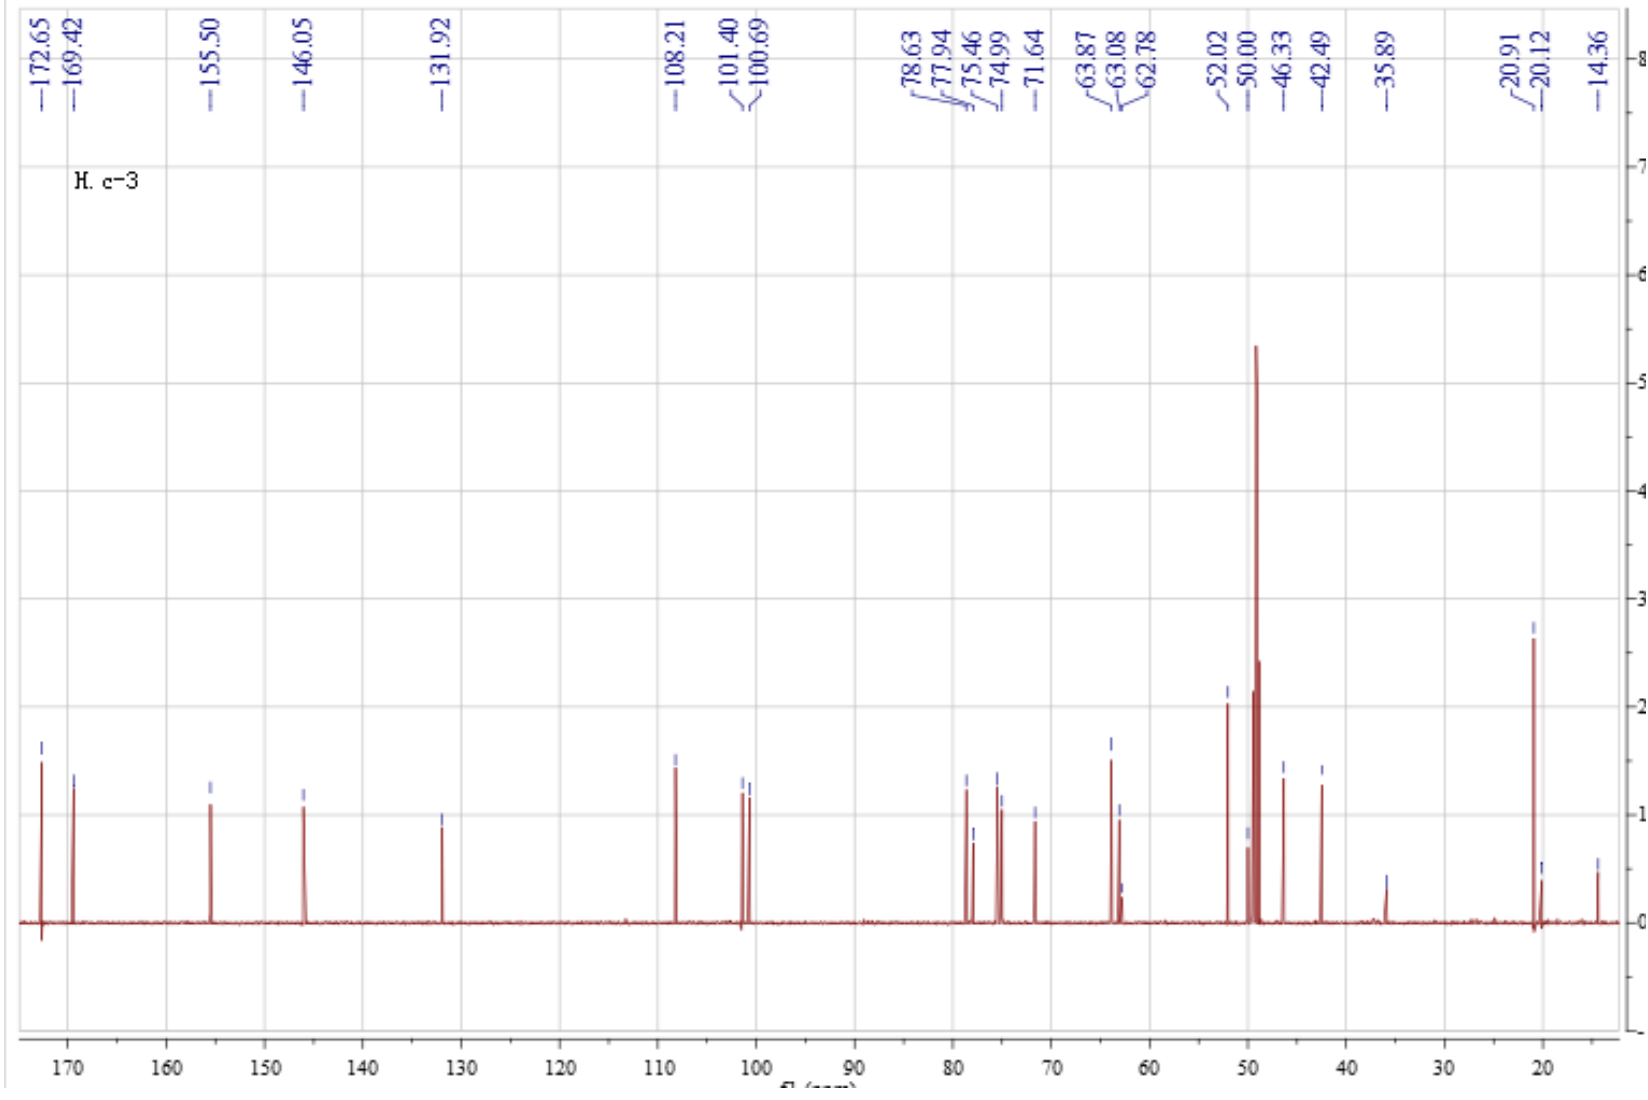

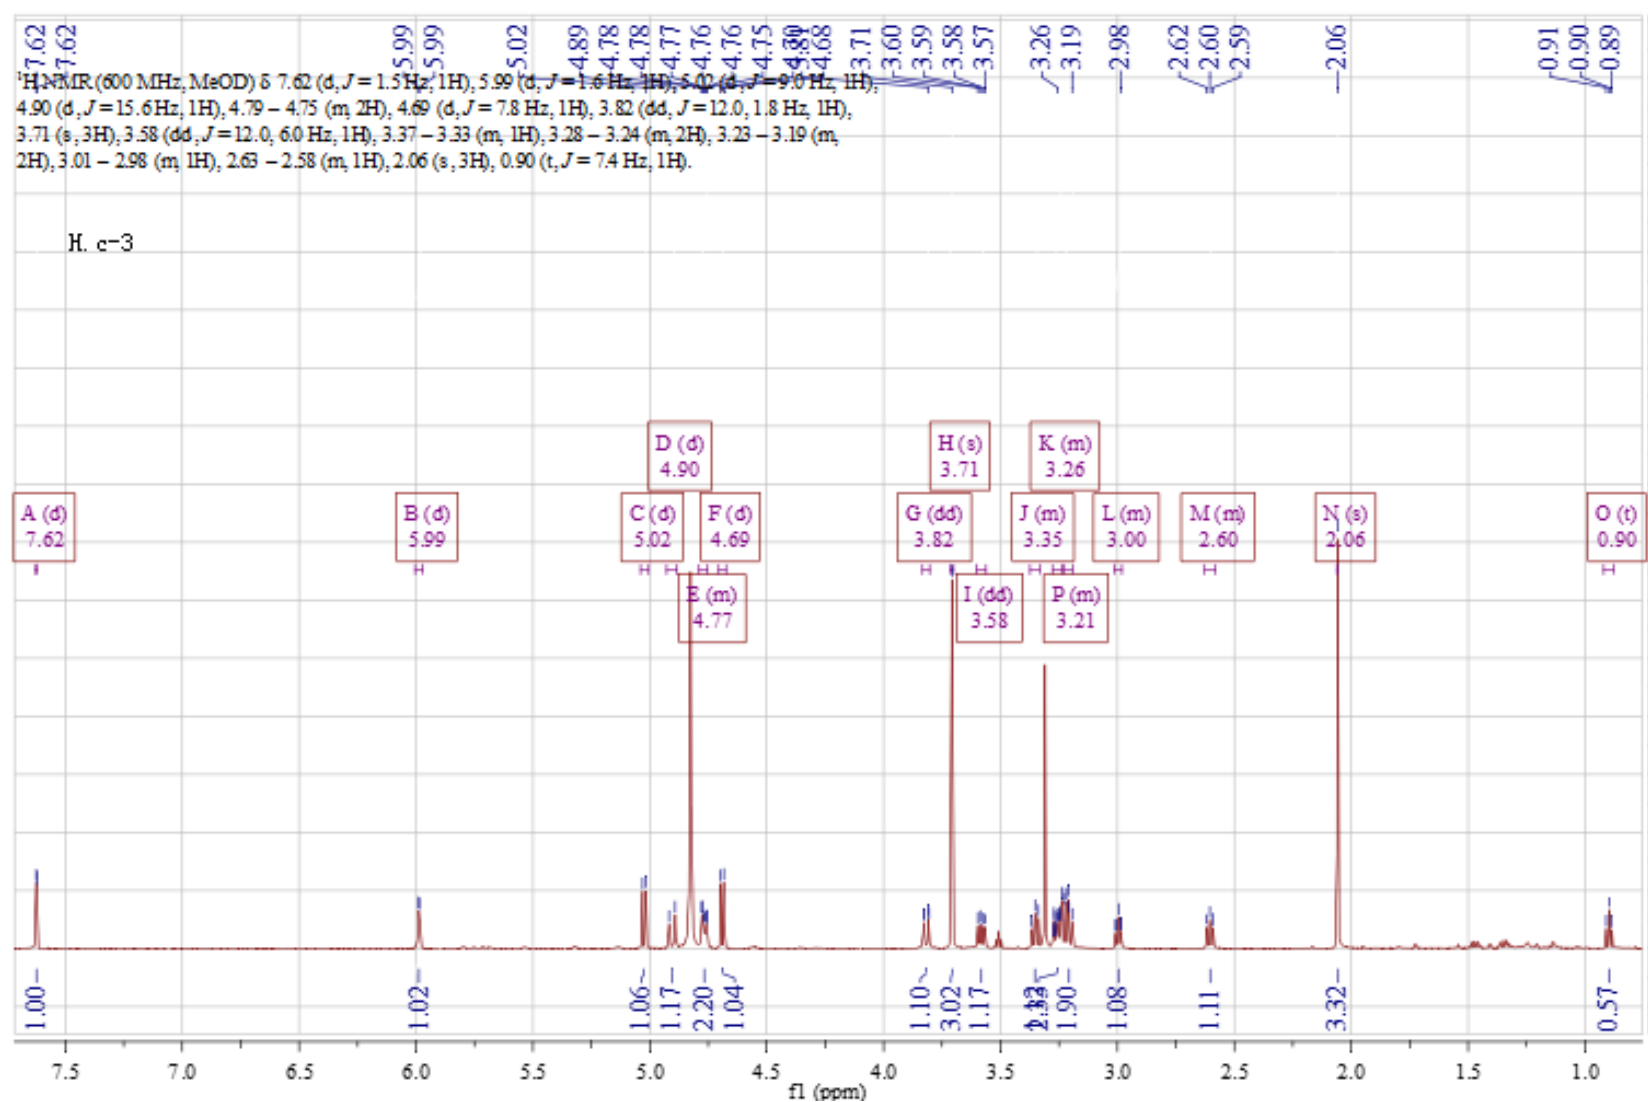

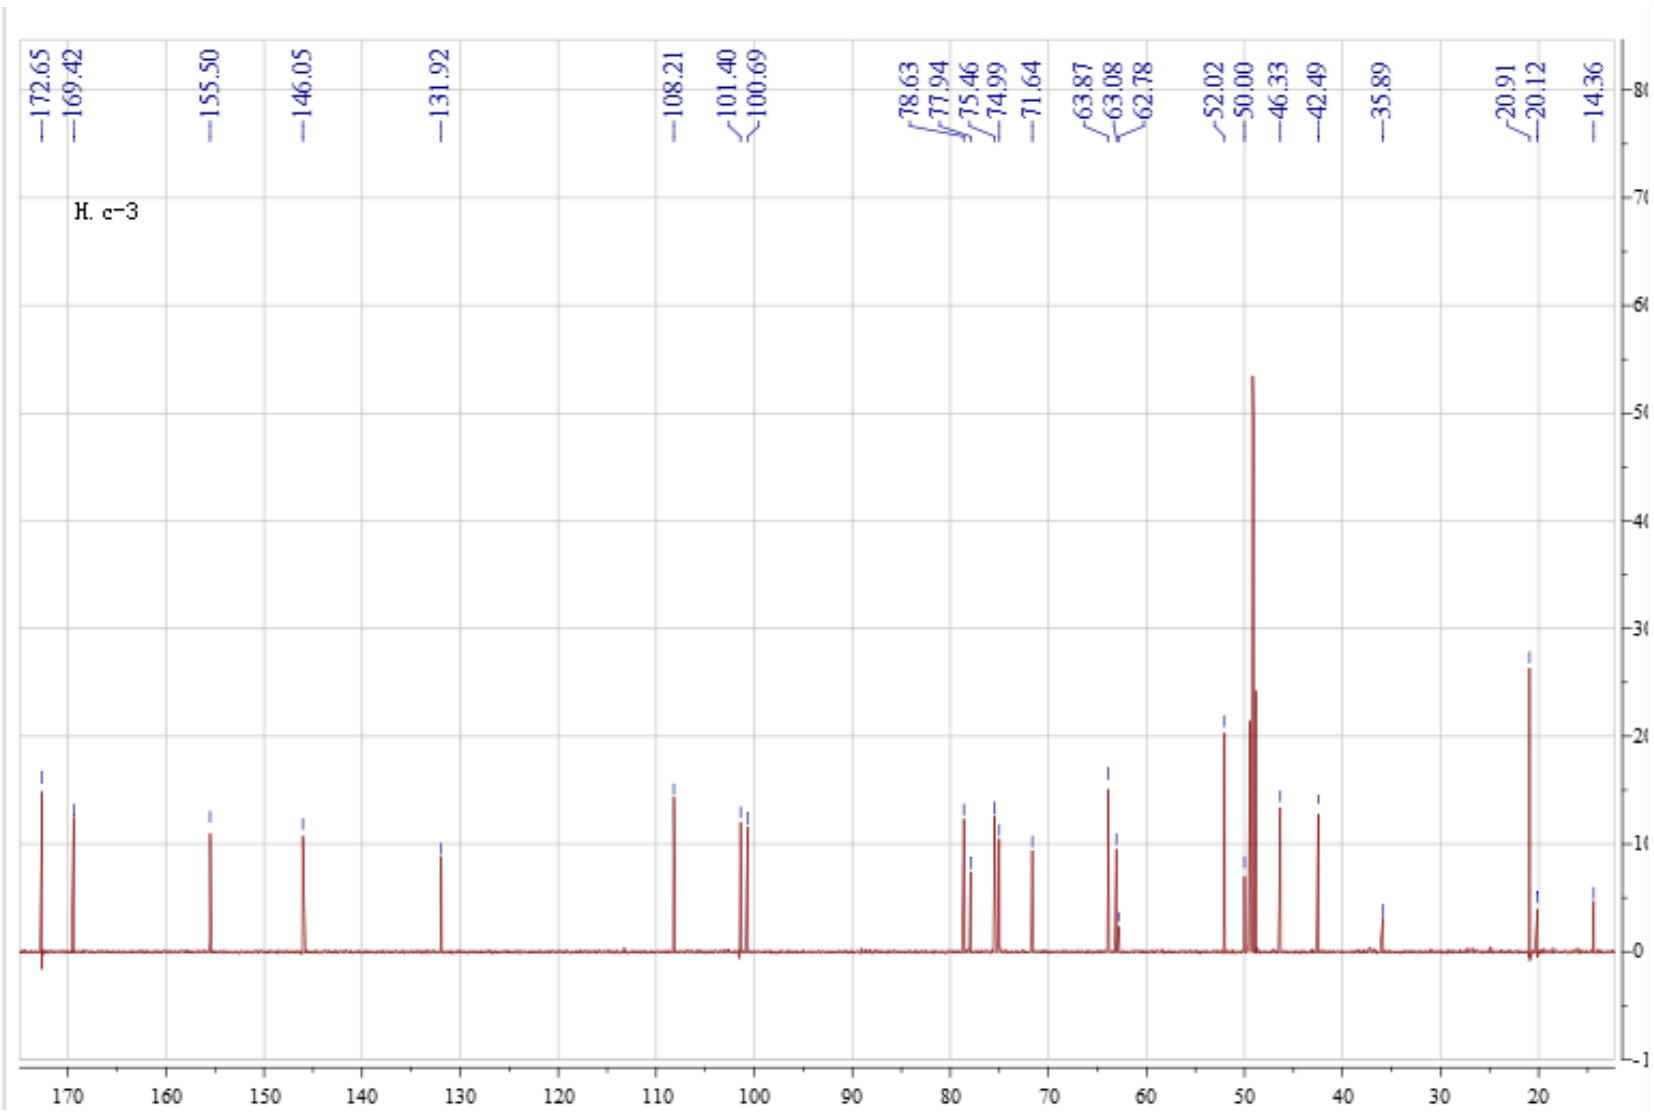

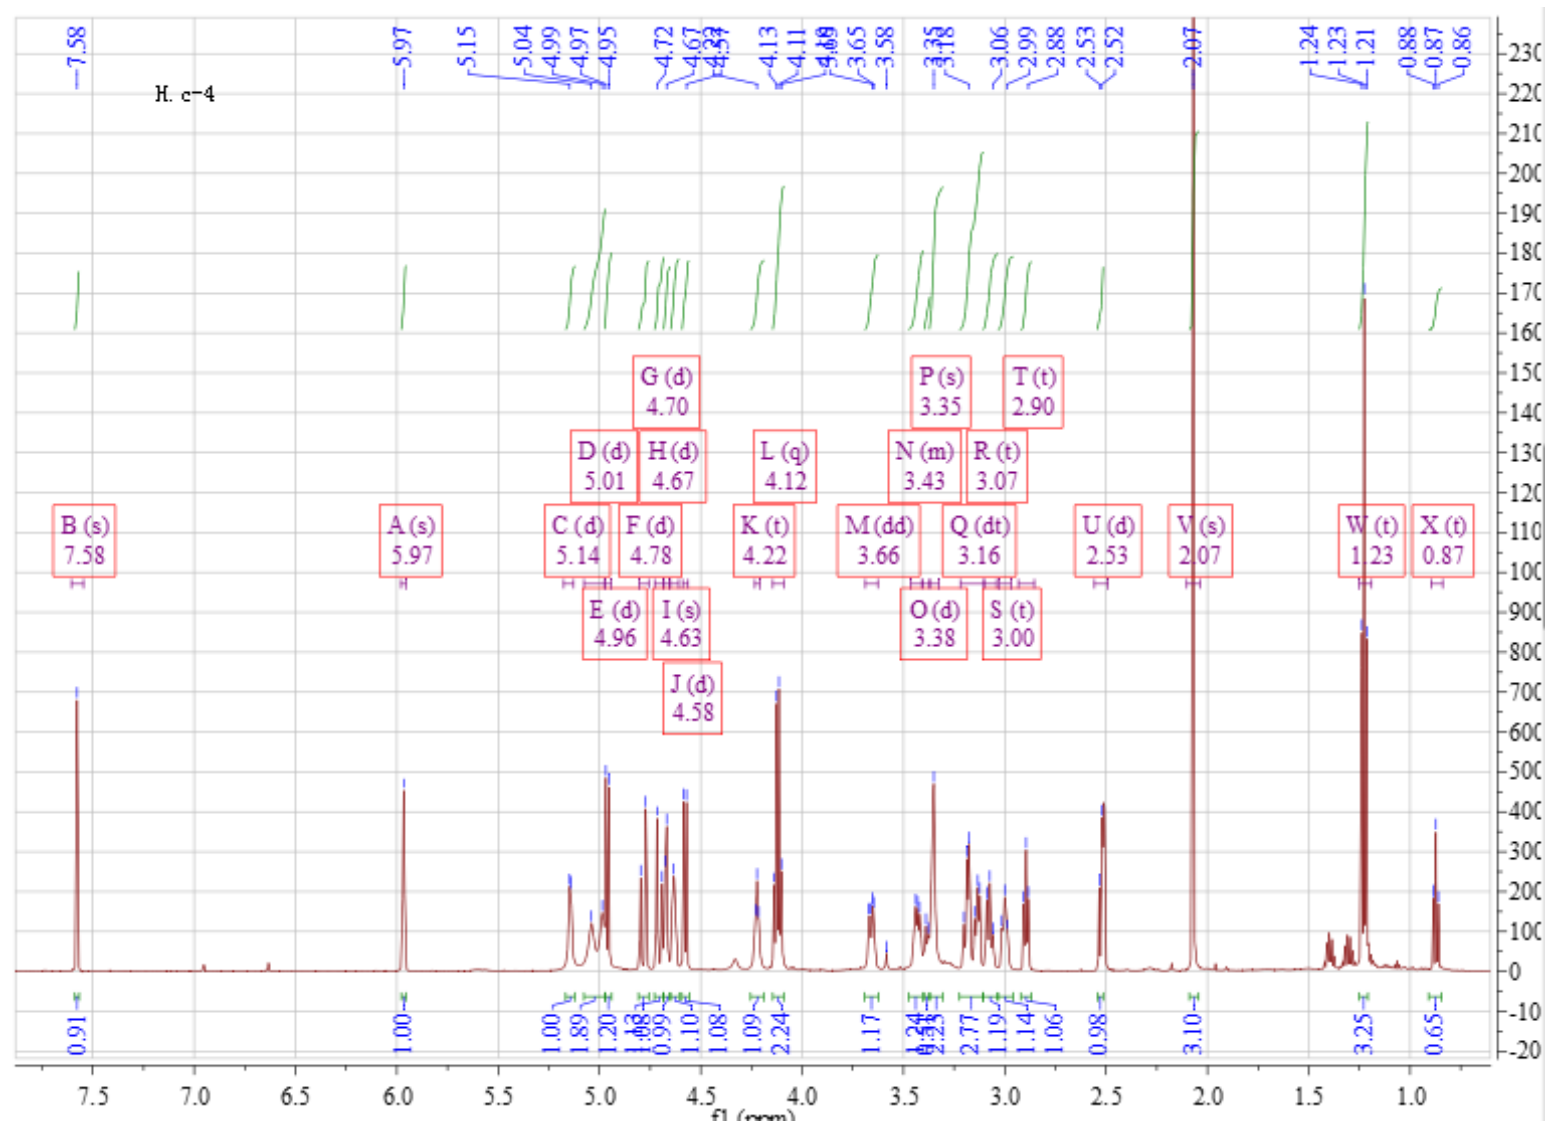

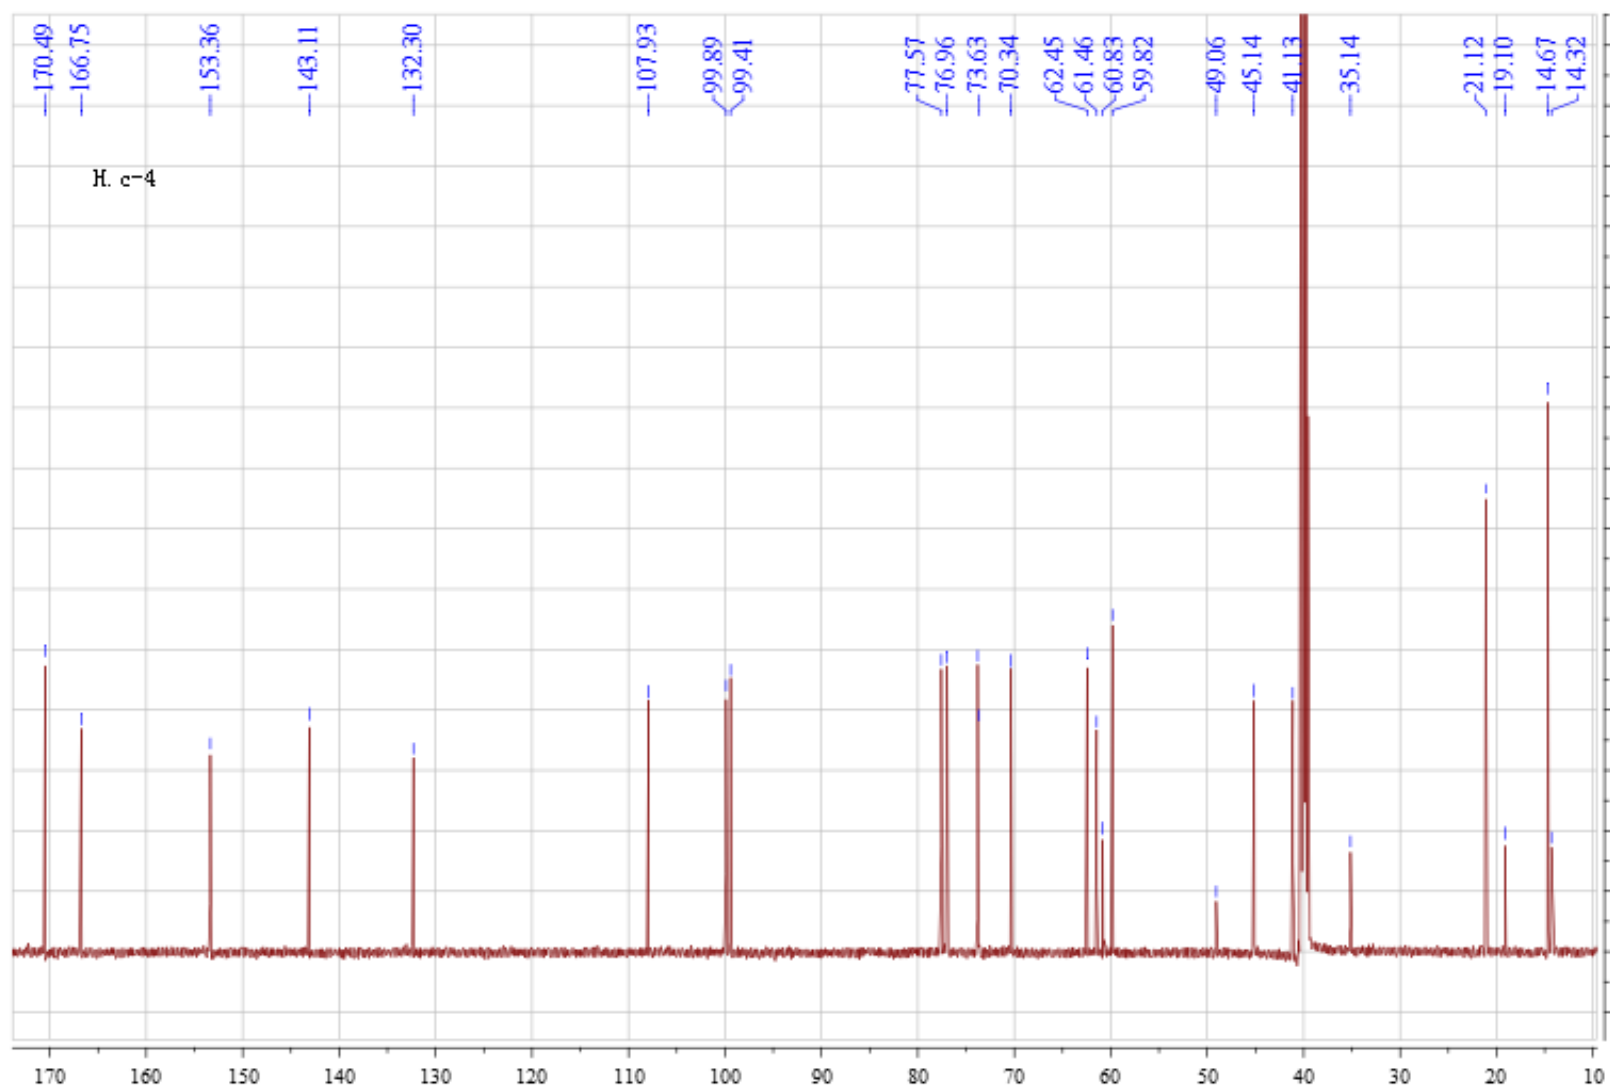

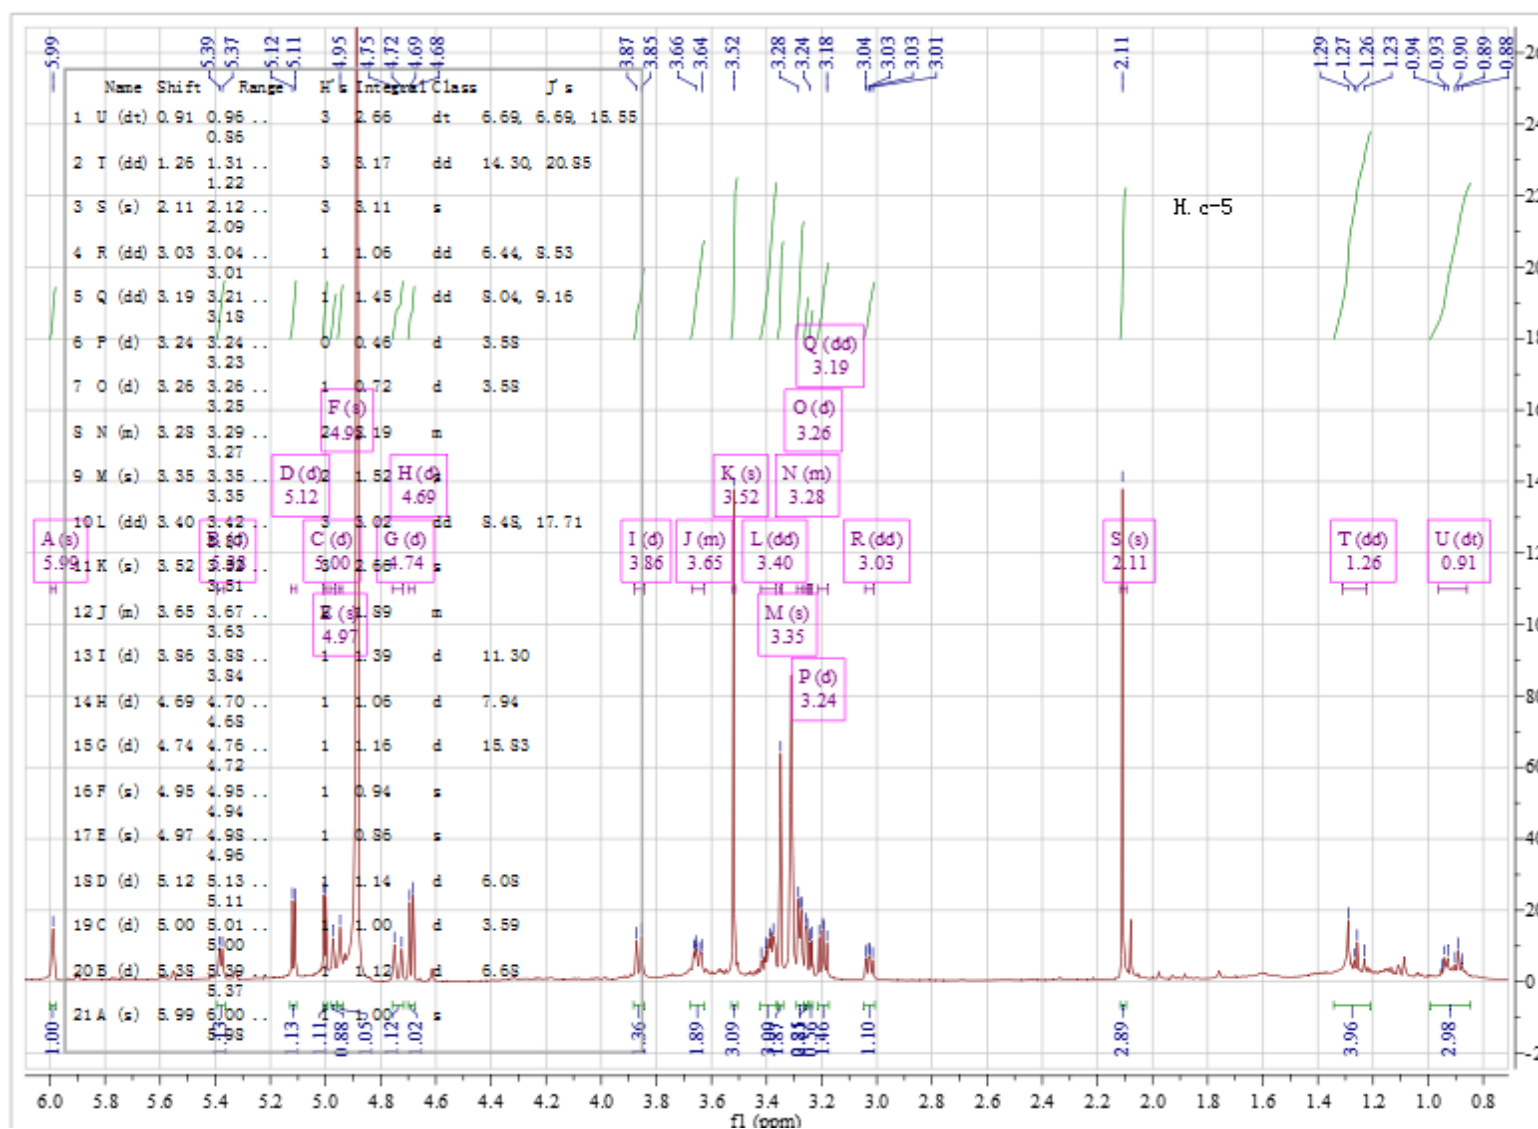

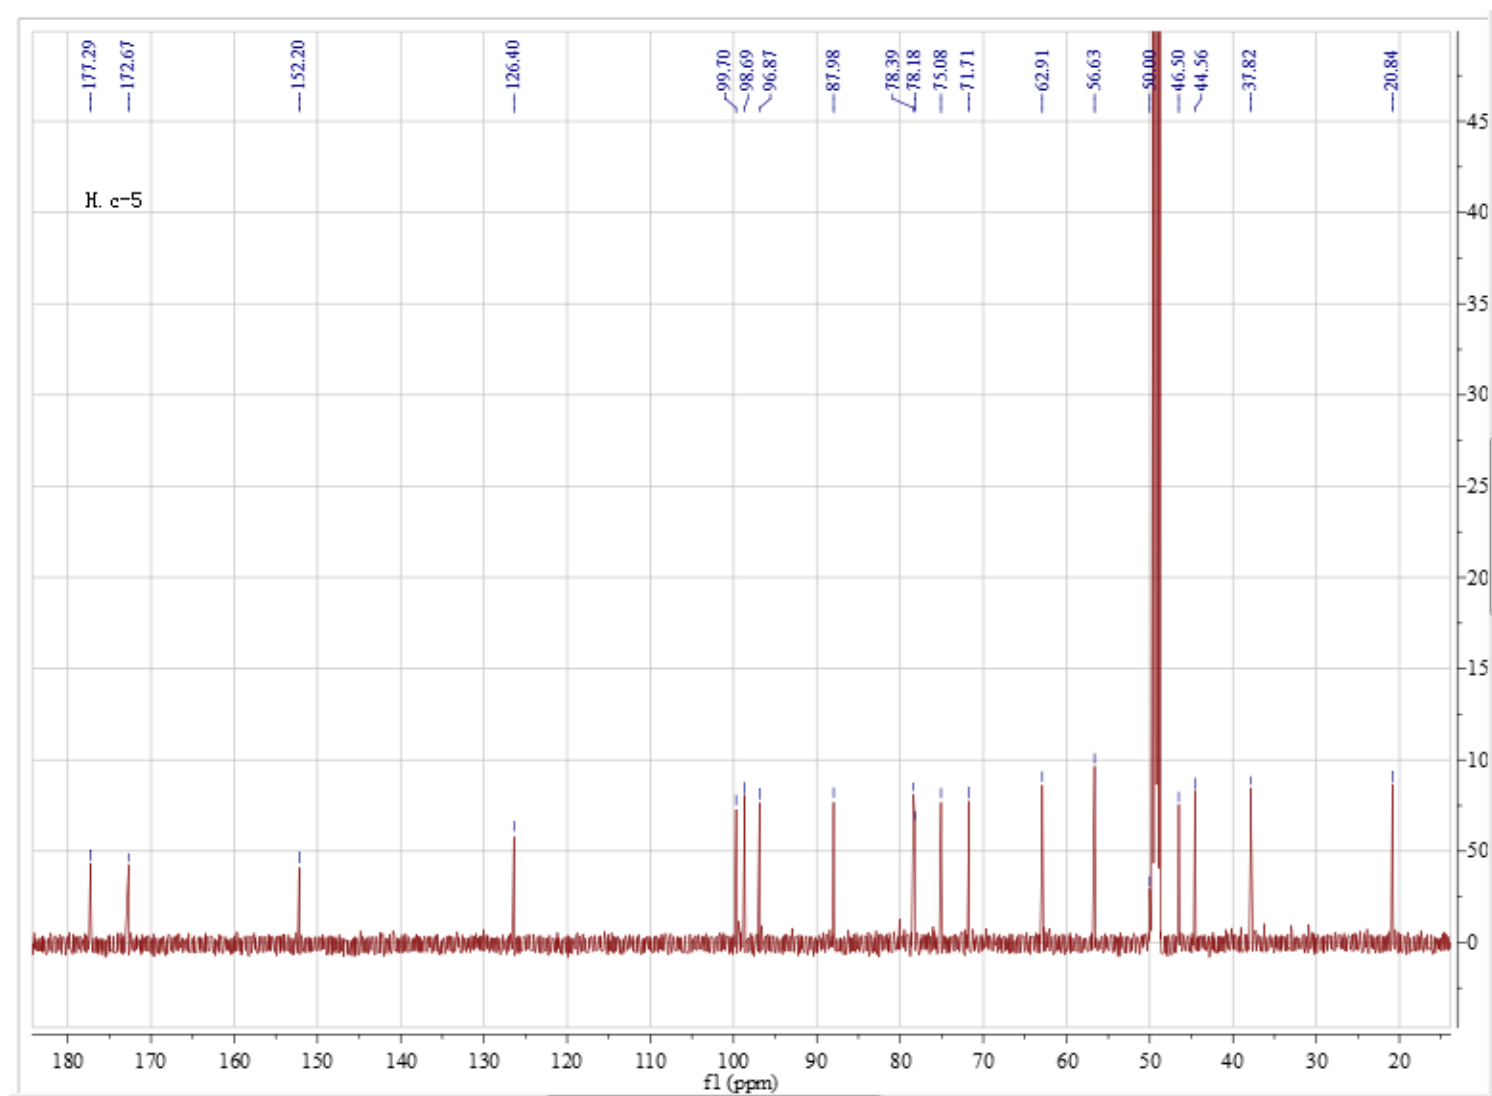

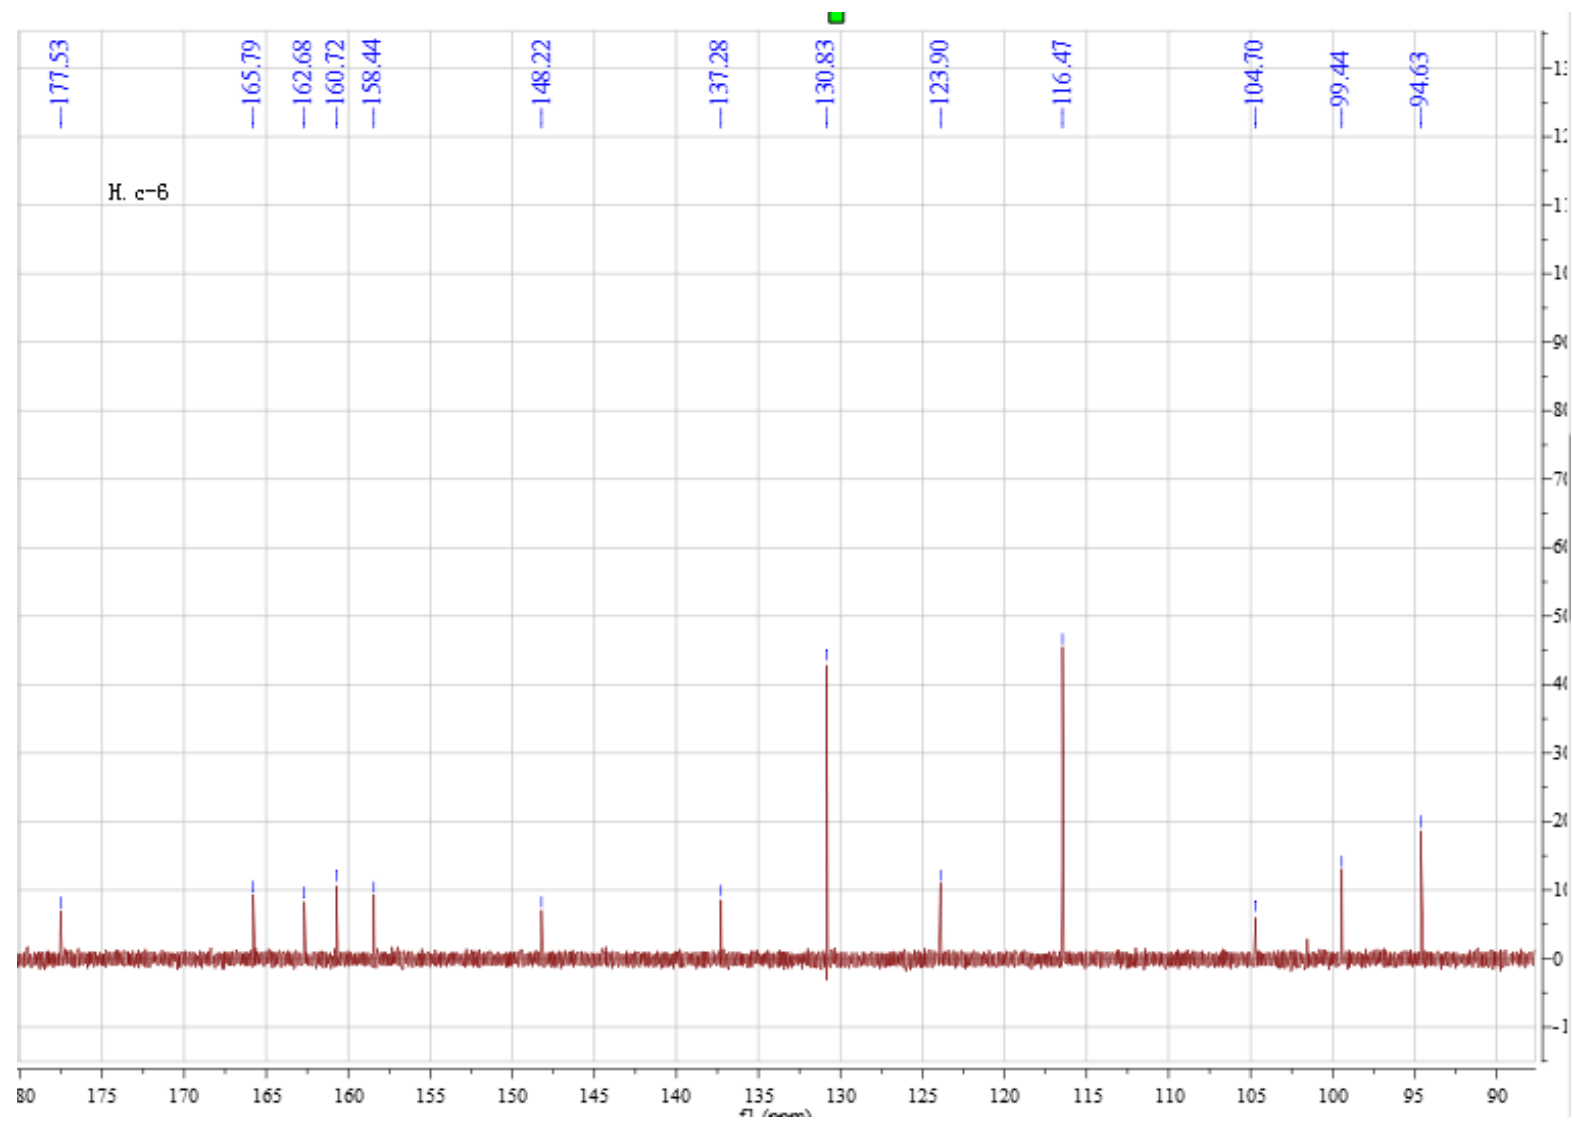

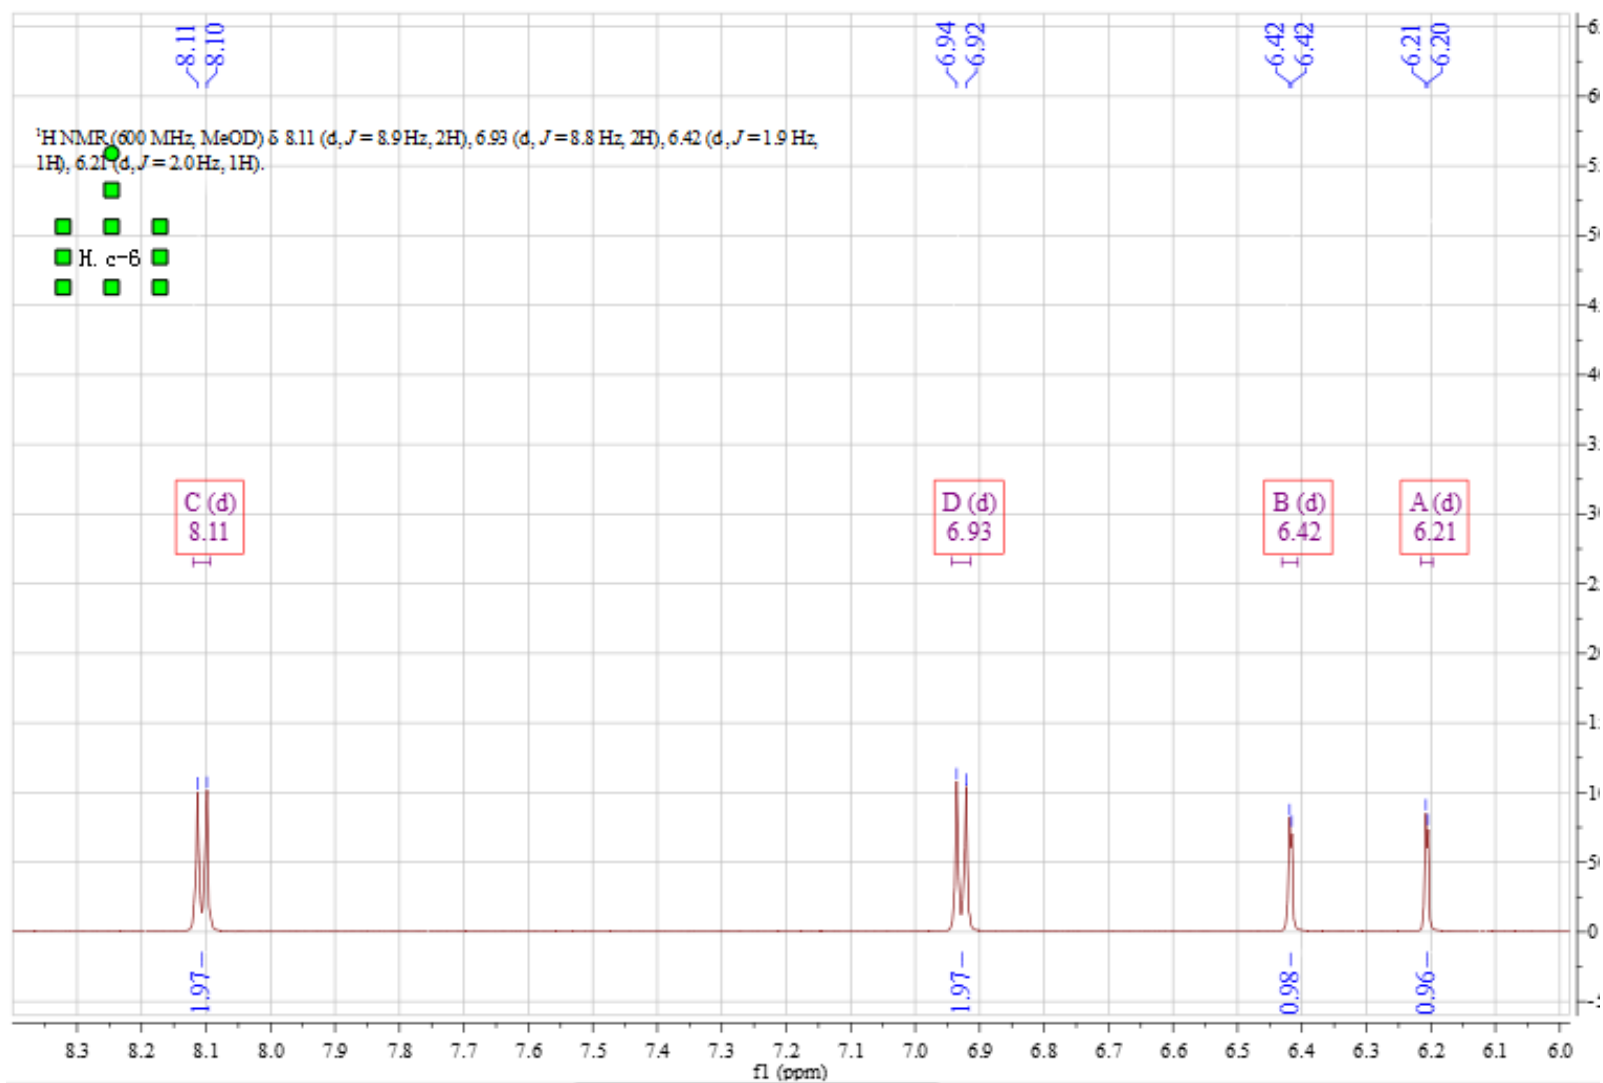

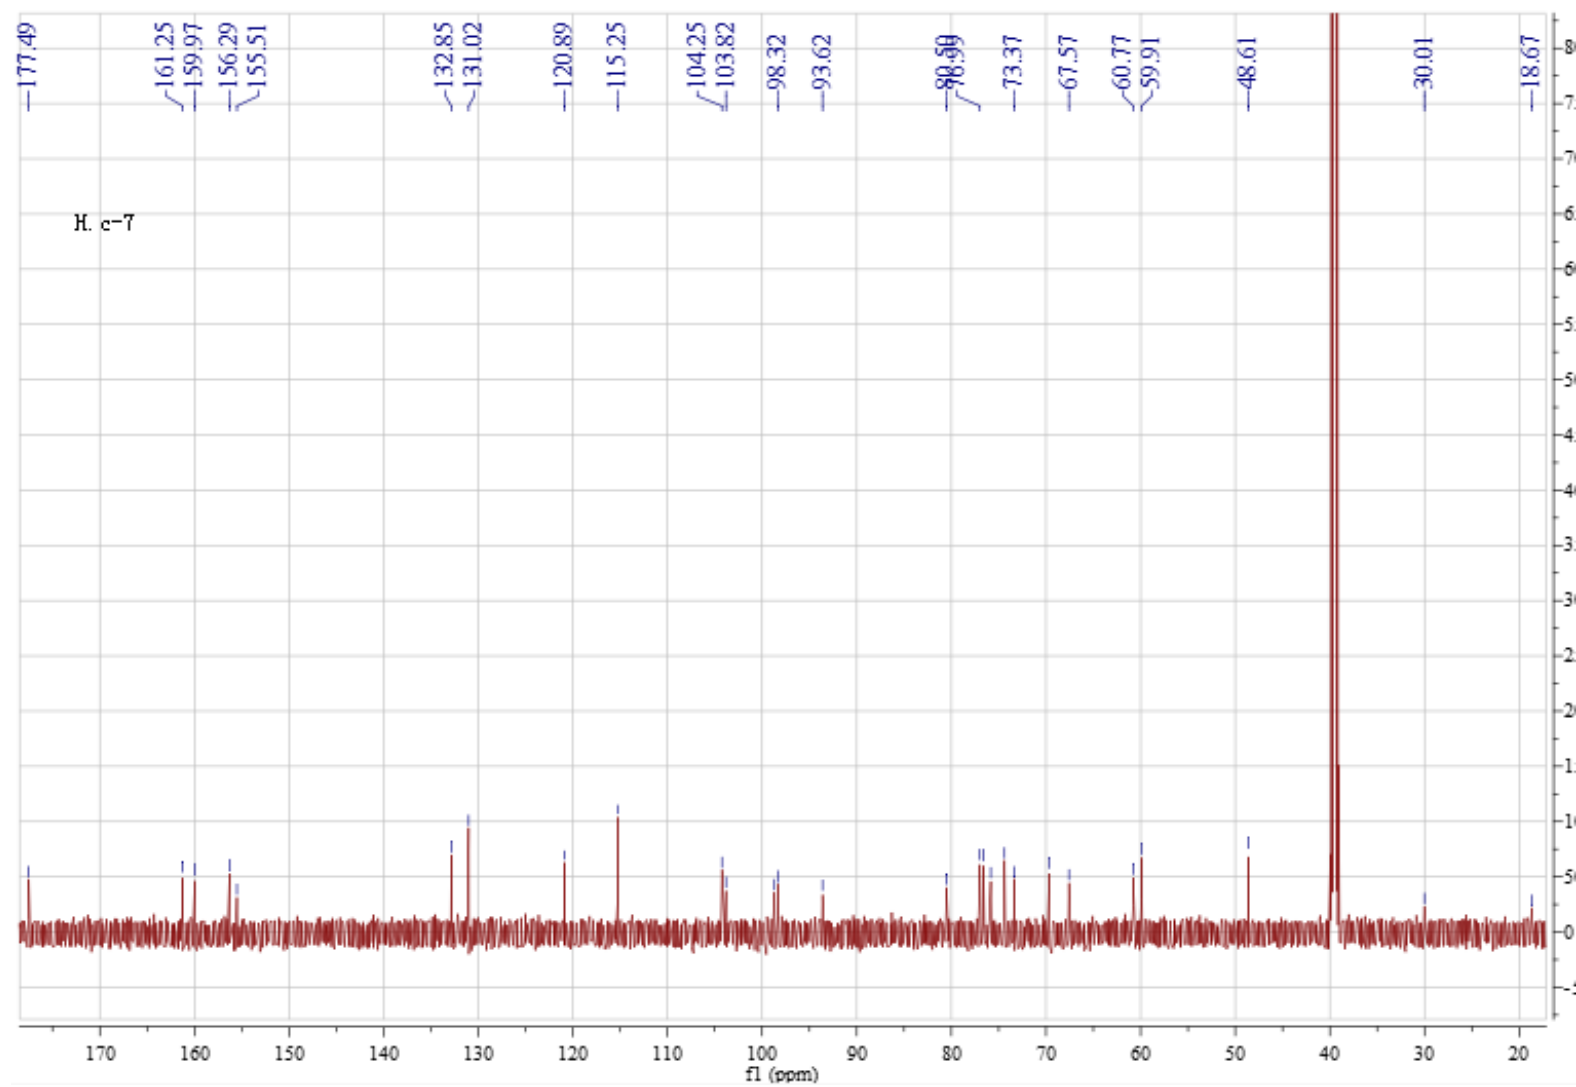

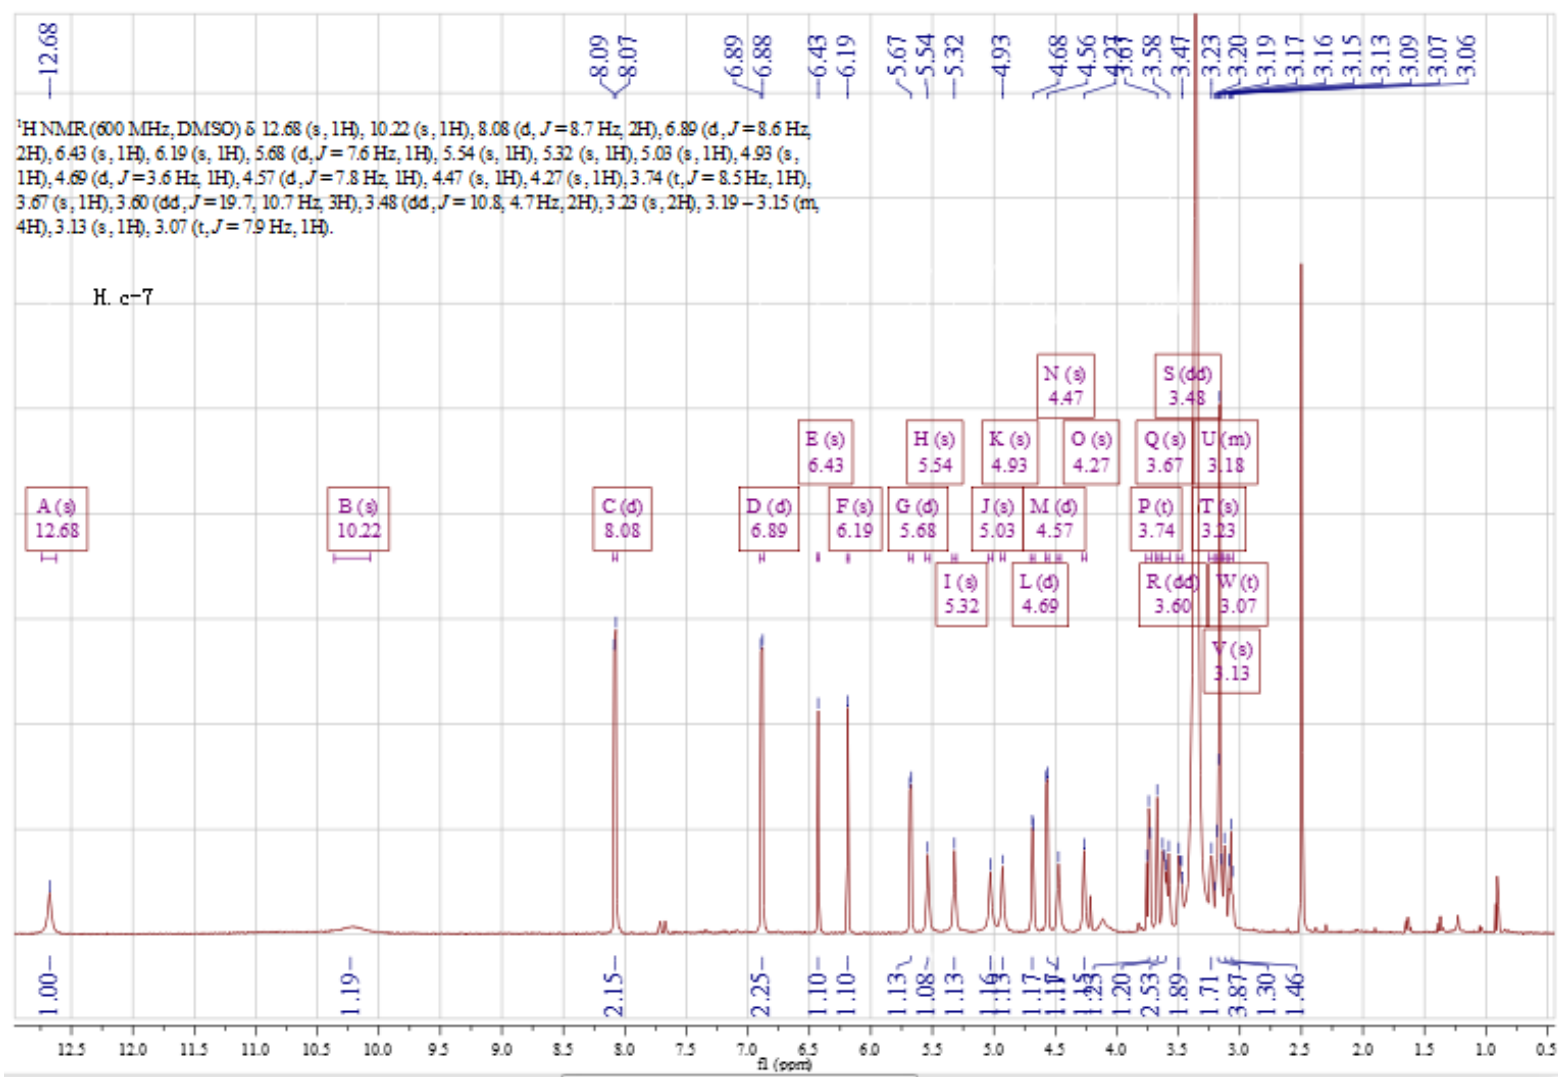

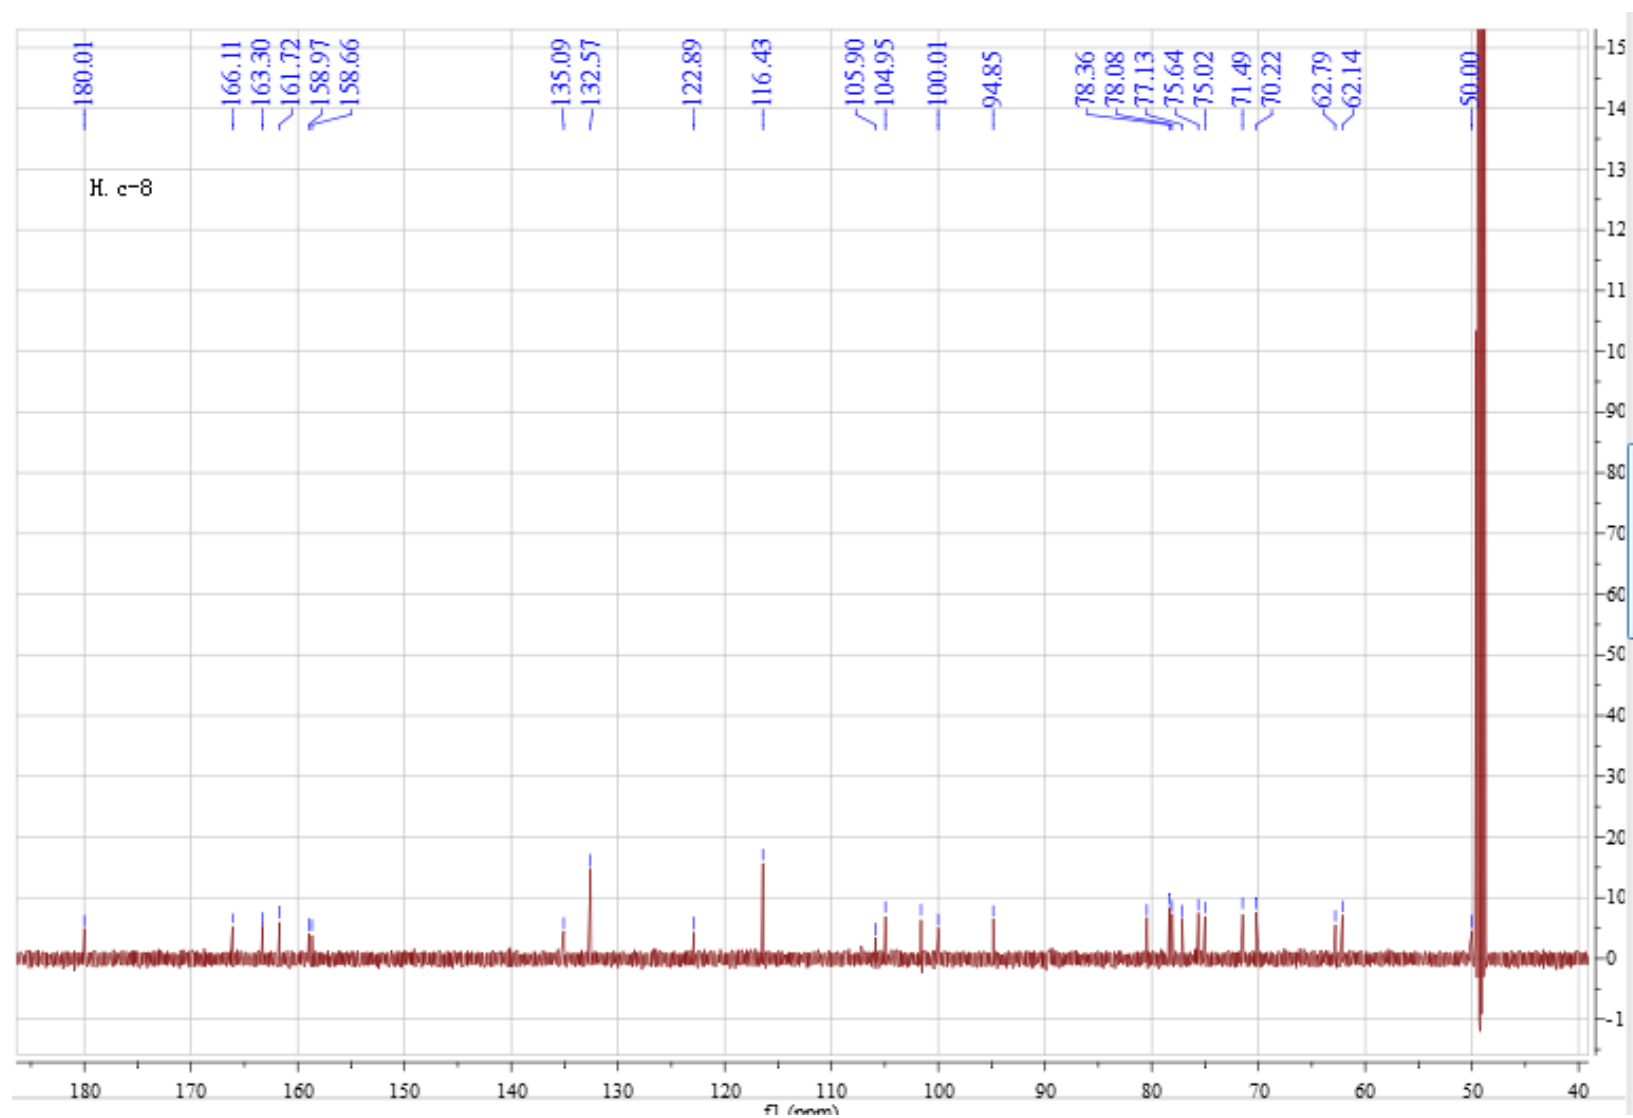

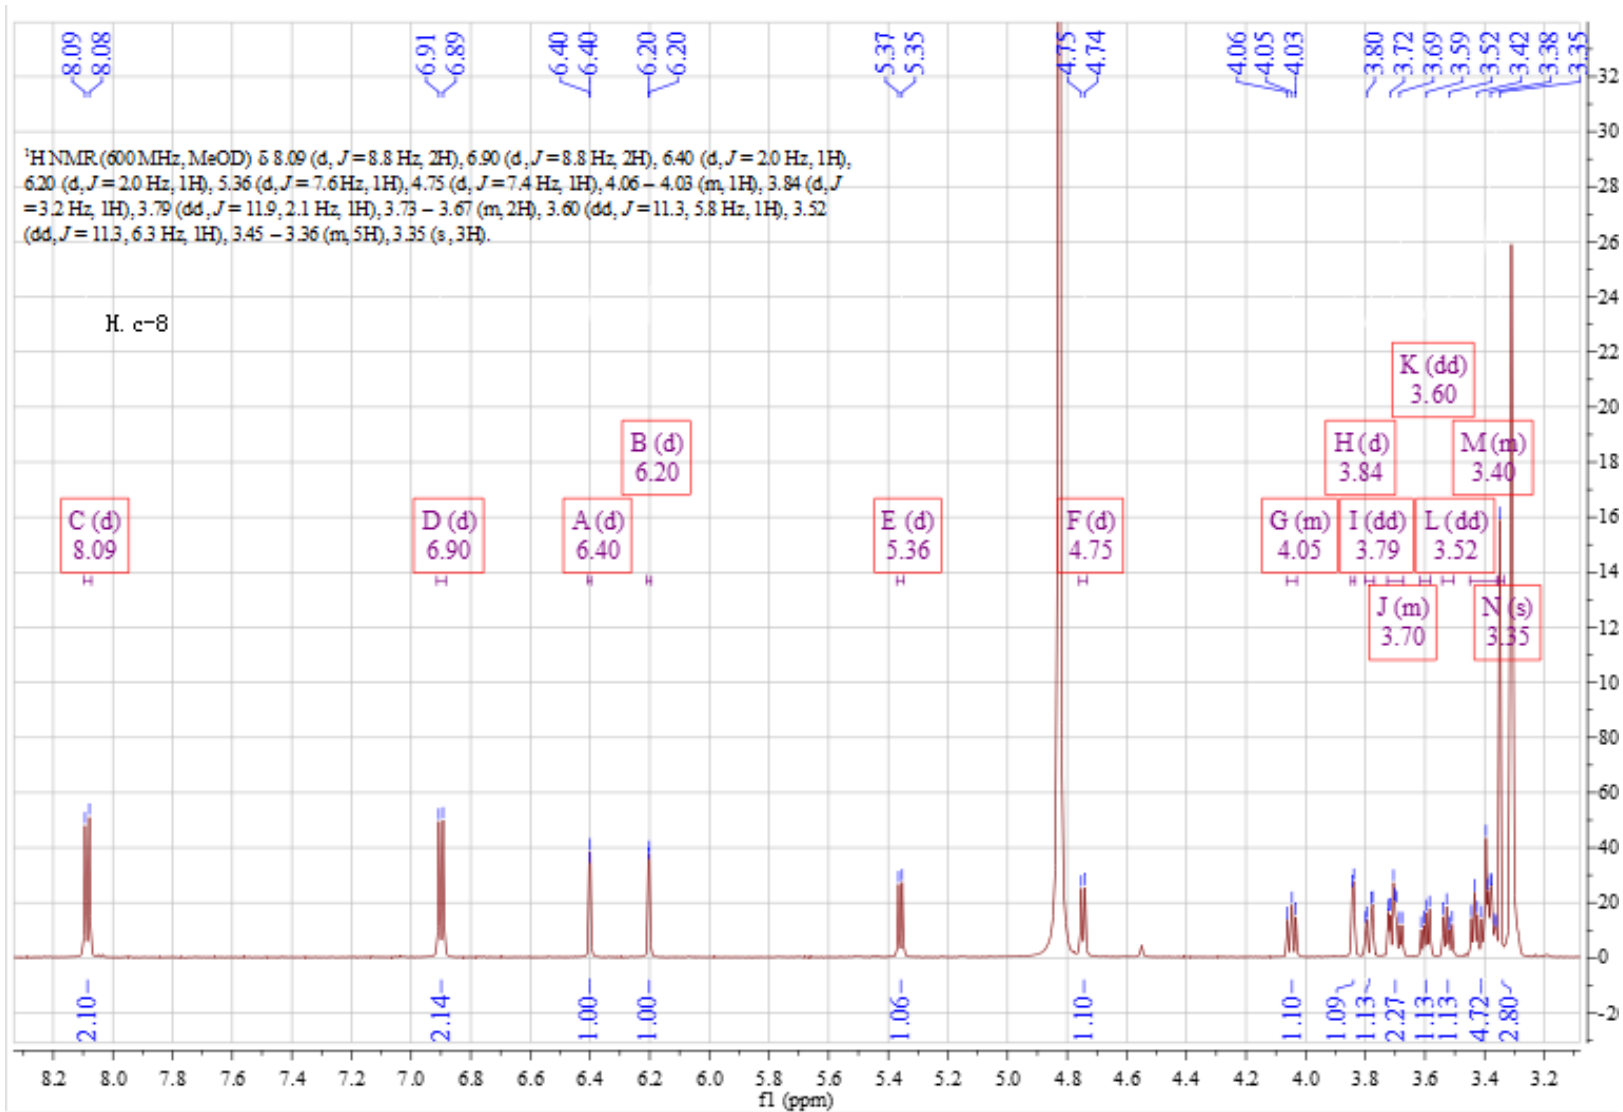

Supplement: Supplementary file [file 28996251]
